# Supplementary material for: Factors associated with caregiver burden among family caregivers of children with cerebral palsy: a systematic review
Source: PubMed Central journal article supplement — BMJ Open. 2023 Apr 3;13(4):e065215. doi: 10.1136/bmjopen-2022-065215 (PMC10083783; doi:10.1136/bmjopen-2022-065215), 2023-04-03
Supplement: bmjopen-2022-065215.draft_revisions.pdf [file bmjopen-2022-065215.draft_revisions.pdf]

# BMJ Open

BMJ Open is committed to open peer review. As part of this commitment we make the peer review history of every article we publish publicly available.

When an article is published we post the peer reviewers' comments and the authors' responses online. We also post the versions of the paper that were used during peer review. These are the versions that the peer review comments apply to.

The versions of the paper that follow are the versions that were submitted during the peer review process. They are not the versions of record or the final published versions. They should not be cited or distributed as the published version of this manuscript.

BMJ Open is an open access journal and the full, final, typeset and author-corrected version of record of the manuscript is available on our site with no access controls, subscription charges or pay-per-view fees (<http://bmjopen.bmj.com>).

If you have any questions on BMJ Open's open peer review process please email [info.bmjopen@bmj.com](mailto:info.bmjopen@bmj.com)

# BMJ Open

## Factors associated with caregiver burden among family caregivers of children with cerebral palsy: A systematic review

|                               |                                                                                                                                                                 |
|-------------------------------|-----------------------------------------------------------------------------------------------------------------------------------------------------------------|
| Journal:                      | <i>BMJ Open</i>                                                                                                                                                 |
| Manuscript ID                 | bmjopen-2022-065215                                                                                                                                             |
| Article Type:                 | Original research                                                                                                                                               |
| Date Submitted by the Author: | 31-May-2022                                                                                                                                                     |
| Complete List of Authors:     | Liu, Fang; Chongqing Medical University<br>Shen, Qiao; Chongqing Medical University Affiliated Children's Hospital<br>Huang, Miao; Chongqing Medical University |
| Keywords:                     | Developmental neurology & neurodisability < PAEDIATRICS, PRIMARY CARE, REHABILITATION MEDICINE                                                                  |
|                               |                                                                                                                                                                 |

SCHOLARONE™  
Manuscripts

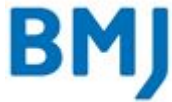

I, the Submitting Author has the right to grant and does grant on behalf of all authors of the Work (as defined in the below author licence), an exclusive licence and/or a non-exclusive licence for contributions from authors who are: i) UK Crown employees; ii) where BMJ has agreed a CC-BY licence shall apply, and/or iii) in accordance with the terms applicable for US Federal Government officers or employees acting as part of their official duties; on a worldwide, perpetual, irrevocable, royalty-free basis to BMJ Publishing Group Ltd ("BMJ") its licensees and where the relevant Journal is co-owned by BMJ to the co-owners of the Journal, to publish the Work in this journal and any other BMJ products and to exploit all rights, as set out in our [licence](#).

The Submitting Author accepts and understands that any supply made under these terms is made by BMJ to the Submitting Author unless you are acting as an employee on behalf of your employer or a postgraduate student of an affiliated institution which is paying any applicable article publishing charge ("APC") for Open Access articles. Where the Submitting Author wishes to make the Work available on an Open Access basis (and intends to pay the relevant APC), the terms of reuse of such Open Access shall be governed by a Creative Commons licence – details of these licences and which [Creative Commons](#) licence will apply to this Work are set out in our licence referred to above.

Other than as permitted in any relevant BMJ Author's Self Archiving Policies, I confirm this Work has not been accepted for publication elsewhere, is not being considered for publication elsewhere and does not duplicate material already published. I confirm all authors consent to publication of this Work and authorise the granting of this licence.

1  
2  
3 **Title:** Factors associated with caregiver burden among family caregivers of children  
4 with cerebral palsy: A systematic review  
5

6 **Running title:** Caregiver burden of children with cerebral palsy  
7

8 **List of all authors:**  
9

10 Fang Liu, Nursing School of Chongqing Medical University, Chongqing, China  
11

12 Qiao Shen, Children's Hospital of Chongqing Medical University, Chongqing, China  
13

14 Miao Huang, Nursing School of Chongqing Medical University, Chongqing, China  
15

16 **Corresponding Author:**  
17

18 Fang Liu, Chongqing Medical University, No. 1 Medical College Road, Yuzhong  
19 District, Chongqing, China  
20

21 Telephone: +8613637926609  
22

23 Email: fangliu@cqmu.edu.cn  
24

25 **Key words:** caregiver burden, cerebral palsy, systematic review  
26  
27  
28  
29

30 **Words count:** 2823  
31

32 **Number of figures and tables:** 1 figure, 4 tables  
33  
34  
35  
36  
37  
38  
39  
40  
41  
42  
43  
44  
45  
46  
47  
48  
49  
50  
51  
52  
53  
54  
55  
56  
57  
58  
59  
60

## Abstract

**Objectives:** To identify caregiver and children factors associated with caregiver burden on primary caregivers of children with cerebral palsy.

**Design:** Systematic review

**Data sources:** Seven electronic databases, including PubMed, Cochrane Library, Scopus, PsycINFO, Web of Science, CINAHL and Embase, were systematically searched up to August 2021.

**Eligibility criteria:** Original observational studies reporting caregiver burden and related factors among caregivers of children with cerebral palsy.

**Data abstraction and synthesis:** Two reviewers independently screened results and assessed the quality of studies. Title, abstract, full-text screening and data abstraction were done independently by two reviewers. Risk of bias was assessed using the JBI Critical Appraisal Checklist for Analytical Cross-Sectional Studies. The quality of evidence for factors was rated using the Grading of Recommendations Assessment, Development and Evaluation (GRADE) approach.

**Results:** 15 articles were included in the review. All studies were cross-sectional and examined caregiver-reported burden measures. The Zarit Burden Interview was the most commonly used questionnaire. Anxiety, depression, mental health and physical health of caregiver, gender and severity of illness in children with CP were moderate to high quality of evidence for factors contributing to caregiver burden.

**Conclusions:** Higher caregiver burden is associated with more depressive feelings and worse life quality of the caregiver, and with more severe physical disability of the children. Future studies should focus on high-quality longitudinal research and appropriate assistance to reduce caregiver burden and improve the quality of caregiving for children with CP.

**Key words:** caregiver burden, cerebral palsy, systematic review

**PROSPERO 2021 CRD:** 42021268284

## Introduction

With the development of domestic perinatal medicine and obstetric technology, the perinatal mortality rate has gradually decreased, but the incidence of cerebral palsy has gradually increased (1). Cerebral palsy (CP) is defined as a group of disorders of the development of movement and posture, causing activity limitation, that are attributed to non-progressive disturbances occurred in the developing fetal or infant brain. The motor disorders of CP are often accompanied by disturbances of sensation, cognition, communication, perception, behaviour, and by a seizure disorder (2). CP is the most common paediatric disability, seriously affecting the children's self-care ability and social activities (3-4). Thus, Children with CP often require lifetime extensive care and rehabilitation training, which will bring heavy psychological, physical and economic burden to their families (5-6).

Parents, as the primary caregivers of children with disabilities, bear the arduous caregiving burden. Not only do they have to help the children's daily activities, but they also need to pay close attention to their changing health conditions, which directly leads to changes in the caregivers' lifestyle and a decline in their quality of life (7-8). Caregiver burden has been defined as a multidimensional response to physical, emotional, psychological, and financial stressors that are associated with caregiving experience (9). Studies have shown that a high level of caregiving burden for children with CP negatively affects the mental and physical health, family functions and social interactions of caregivers, resulting in low quality of care and unmet patient needs (10-13). Paying attention to the burden of caregivers is of great significance.

Relevant factors that affect caregiver burden should be studied in order to propose interventions to support caregivers. In the last decade, there has been an increasing number of studies on the care burden for children with CP, but a comprehensive review of caregiver factors and patient factors influencing caregiver burden is lacking. Therefore, the objective of this study was to systematically review published literature to identify caregiver and patient factors of caregiver burden among primary caregivers of children with CP.

## Methods

This systematic review was conducted based on the Preferred Reporting Items for Systematic Reviews and Meta-Analyses (PRISMA) guidelines (Appendix 1). The protocol has been registered with PROSPERO 2021 CRD 42021268284.

### Search strategy

The electronic databases PubMed, Cochrane Library, Scopus, PsycINFO, Web of Science, CINAHL and Embase were systematically searched from inception to August 2021. The search string contained four groups of combinations of medical subject headings and text words: Caregiver (MeSH term), care\*, parents or mother; Caregiver burden (MeSH term), stress, strain or burnout; Cerebral palsy (MeSH term), CP, disability\* or neurodev\* disorder\*; Children (MeSH term), child\* or paediatr\* (Appendix 2). Additionally, we also searched for grey literature using the first 500 hits from Google Scholar and Open Grey. References for relevant publications were checked to make sure that no relevant papers had been missed.

### Inclusion & Exclusion criteria

Original observational studies reporting burden and related factors of caregivers of children with

CP were taken as the primary focus of the research; Study participants need to be primary caregivers (over 18 years old) of children (0-18 years old) with cerebral palsy. Burden had to be assessed with a total caregiver burden construct; Full-text articles published in English or with an English translation in peer-reviewed journals were included. Studies where caregivers of children with different diagnoses and children with adults are grouped together were excluded, unless results were reported separately for caregivers of children with CP. Intervention studies, reviews, non-original research papers, qualitative research studies were not eligible for this review.

### Data extraction and Quality assessment

The titles/abstracts of citations retrieved using the search strategy were independently assessed by two reviewers. The full text articles of potentially relevant studies were then independently screened by two reviewers, and any discrepancies were resolved through discussion. The number of studies excluded during each screening phase, and the reasons for full-text exclusion will be described in a PRISMA flow diagram. A pre-specified form will be used for the extraction of the data from the included studies. This procedure will be completed by one reviewer, and verified by a second reviewer, with any disagreements being resolved through discussion with a third-party reviewer. We extracted the following data from each included study independently by two researchers: first authors, year of publication, sample size, study design, relevant participant demographics, key predictor and outcome variables, self-administered tools used for measurement, results and associations.

Risk of bias was assessed using the JBI Critical Appraisal Checklist for Analytical Cross-Sectional Studies (Appendix 3) by the two researchers independently. The checklists include 8 questions to evaluate the overall quality of the studies from the research object, disease, measurement of influencing factors and confounding factors, data analysis, etc. The choices of answers were 'yes', 'no', 'unclear' or 'not applicable'. The overall appraisal of 'include', 'exclude' or 'seek further information' were presented in the last section of the checklist.

### Data synthesis

Due to the diversity of outcome measures and factors included in the study, a meta-analysis was not possible. Bivariate associations were described in terms of correlation coefficients ( $r$ ) or student statistics or F-statistics. Multivariate associations were described in terms of standardized or Unstandardized coefficients ( $\beta$  or  $b$ ). In studies that applied a logistic regression, the odds ratio ( $OR$ ) was presented. Factors were grouped into caregiver and children characteristics subsequently thematically categorized.

### Quality of evidence

We assessed the quality of evidence for each factor measured in at least three studies using the Grading of Recommendations Assessment, Development and Evaluation (GRADE) approach (Appendix 4). Two researchers rated the factors based on the study limitations in risk of bias, inconsistency, imprecision, indirectness and publication bias. Certainty of the evidence cannot be rated up for "dose effect" or "large effect". GRADE has four levels of evidence: very low, low, moderate, and high.

### Patient and public involvement

Patients or public were not involved in the conduct of this systematic review.

## Results

### Search and screening

The search identified a total of 14511 possibly relevant articles. After the removal of duplicates and the abstract screening, a total of 68 studies were selected for full-text review. Finally, 15 studies were left for full inclusion in the review. There were no additional articles met the inclusion criteria when searching the references of the 15 articles. The PRISMA flow diagram for search and screening results are shown in Figure 1.

### Risk of bias

Risk of bias scores for studies ranged from 4 to 7 out of a maximum of 8 points. Some articles lacked clear information in items: study subjects and the setting, exposure factors, and confounding bias. The methodological quality assessment list was listed in supplementary Appendix 5.

### Characteristics of the included studies

The 15 included studies reported on overall caregiver burden and related factors of children with CP. Studies were conducted in ten different countries between 2011 and 2021, involving in 1919 caregivers (not inclusive of controls). Of these, 13 studies investigated univariate associations; 8 studies were explored in multivariate associations. Caregivers were predominantly female, and 4 of the 15 articles had samples made up exclusively of mothers. 6 articles involved fathers. The mean age of caregivers varied from 31 to 42 years. Four studies involved control populations, two of four had caregivers of healthy children as the control group. All studies were cross-sectional surveys. The most used sampling method was convenience sampling. The key characteristics of each study are presented in Table 1.



**Table 1. The summary of included studies**

| Authors (Year)                          | Country   | Design                     | Caregiver sample size | Caregiver relation to child | Mean age of Caregivers M(SD) | Age of children (range) | Measures tool |
|-----------------------------------------|-----------|----------------------------|-----------------------|-----------------------------|------------------------------|-------------------------|---------------|
| Carona et al. (2013) <sup>14</sup>      | Portugal  | Cross-sectional Study      | 93                    | Mothers (83.8%)             | 42.34(5.72)                  | 8-18                    | BM            |
| Bella et al. (2011) <sup>15</sup>       | Brazil    | Cross-sectional Study      | 38                    | Mothers (-)                 | 33.3(7.7)                    | 4-11                    | BI            |
| Whittingham et al. (2013) <sup>16</sup> | Australia | Correlational survey study | 94                    | Mothers (90.4%)             | -                            | 2-12                    | DPC Burden    |
| Farajzadeh et al. (2021) <sup>17</sup>  | Iran      | Cross-sectional study      | 160                   | Female (84.4%)              | 35.47(6.59)                  | 2-14                    | CDS           |
| Boztepe et al. (2019) <sup>18</sup>     | Turkey    | Cross-sectional Study      | 69                    | Mothers (100%)              | 34.6(7.3)                    | 1-18                    | ZBI           |
| Omole et al. (2019) <sup>19</sup>       | Nigeria   | Cross-sectional Study      | 209                   | Female (91.9%)              | 34.6(9.2)                    | 1-12                    | CDS           |
| Terathongkum et al. (2020) <sup>8</sup> | Thailand  | correlational research     | 75                    | Female (88.0%)              | -                            | 0-18                    | VQ burden     |
| Farajzadeh et al. (2020) <sup>20</sup>  | Iran      | Cross-sectional Study      | 203                   | Mothers (100%)              | 34.48(6.74)                  | 4-14                    | CDS           |
| Wijesinghe et al. (2015) <sup>21</sup>  | Sri Lanka | Cross-sectional Study      | 375                   | Mothers (97%)               | 32.4(7.2)                    | 1-12                    | CDS           |
| Barutcu et al. (2021) <sup>22</sup>     | Turkey    | Cross-sectional Study      | 109                   | Mothers (98.2%)             | 38.53(9.62)                  | 1-18                    | ZBI           |
| Ozkan et al. (2018) <sup>23</sup>       | Turkey    | Cross-sectional Study      | 120                   | Mothers (100%)              | -                            | 2-18                    | ZBI           |
| Gugala et al. (2021) <sup>24</sup>      | Poland    | Cross-sectional Study      | 190                   | Female (72.6%)              | 40.6(9.1)                    | 2-18                    | CBS           |
| Marrón et al. (2013) <sup>25</sup>      | Spanish   | Cross-sectional Study      | 62                    | Mothers (88.7%)             | 41.98(5.64)                  | 1-17                    | ZBI           |
| Albayrak et al. (2019) <sup>12</sup>    | Turkey    | Cross-sectional Study      | 101                   | Mothers (100%)              | 34.93(8.7)                   | 0-18                    | ZBI           |
| Santos et al. (2012) <sup>26</sup>      | Brazil    | Cross-sectional Study      | 21                    | Female (100%)               | 31(-)                        | 1-12                    | ZBI           |

BM: The Revised Burden Measure; BI: The Burden Interview; DPC Burden =Daily Parenting Tasks Checklist-Parenting Burden; ZBI: Zarit Burden Interview;

CDS: Caregiver Difficulties Scale; CBS: Caregiver Burden Scale; VQ burden: Thai version Viriyaprasart's questionnaire about burden of care

## Measures of burden

Seven instruments were used to measure caregiver burden including Zarit Burden Interview ( $n= 6$ ) (12,18,22-23,25-26); Caregiver Difficulties Scale ( $n= 4$ ) (17,19,20-21); Caregiver Burden Scale ( $n= 1$ ) (24); The Revised Burden Measure ( $n= 1$ ) (14); The Burden Interview ( $n= 1$ ) (15); Daily Parenting Tasks Checklist-Parenting Burden ( $n= 1$ ) (16); Viriyaprasart's questionnaire about burden of care ( $n= 1$ ) (8).

## Studied factors in relation to caregiver burden

Overviews of caregiver and children characteristics as factors of caregiver burden are presented in Tables 2 and 3. The criteria for compelling evidence is that each factor was measured in at least three studies reported significant relationships. The detailed description is described as follows.

### Caregiver factors

Caregiver factors were grouped into five categories, including caregiver demographics, emotional functioning, physical functioning, overall health and social functioning. Caregiver demographical factors included age (8,12,18-19,21-22), gender (19,22), educational level (18-19,21-22), monthly income (18-19,21-22), number of caregiver (22), socioeconomic status (19), geographic area (21), additional helper (18), daily caring time (12). Emotional functioning factors included anxiety (17,22,24), depression (12,17-18,20,22,24-25), Mental health (12,14-15,20), perceived stress (15,17), beliefs of rehabilitation (8), perceived self-efficacy (8,25), experiential avoidance (16). This category was included in eleven of the 15 studies. Physical functioning factors included sleep quality (12), pain (12,15), fatigue (12,20), Physical health (12,15,20). Overall health factors included quality of life (8,14). Social functioning factors included social functioning (15,20), environment health (20), social support (8,14), coping (16,21).

### Children factors

Children factors were grouped into five categories, including children demographics, disease-related, behavioural functioning, overall health and social environment. Children demographical factors included age (8,12,18-19,21-22), gender (18,19,21), birth order (19), number of children (18,21-22), number of disabled child (22), body mass index (12). Disease-related factors included type of CP (19,21), severity of CP (12,18,19,25), etiology (19), additional physical illness (18), associated conditions (19,21), functional impairments (21). This category was included in five of the 15 studies. Behavioural functioning factors included functional status (22), behavioural problems (14,16). Overall health and social environment factors included quality of life (14,23), social support (14) and environment (26).

## Evidence for factors related to caregiver burden

### Caregiver factors

The results of evidence synthesis for caregiver factors using the GRADE criteria were that "anxiety" and "depression" were the high quality of evidence for factors of caregiver burden, "mental health" and "physical health" were the moderate quality of evidence for factors of caregiver burden. Low quality of evidence was found for the relationship between caregiver burden and "age" "education" and "monthly income" of caregivers (see Table 4). Factors within the categories social functioning of the caregiver, were studied in fewer than three studies and

1  
2  
3 could not be rated with the GRADE.  
4

5 **Children factors**

6 The synthesis of the evidence for children factors resulted in high quality of evidence between  
7 caregiver burden and “severity of illness”. The factors for “gender” of children were the moderate  
8 quality of evidence caregiver burden. “Age” of children and “number of Children” were  
9 respectively very low and low quality of evidence for the relations with caregiver burden. Few of  
10 the included studies have explored children factors, and fewer factors have been able to perform  
11 evidence synthesis.  
12  
13  
14  
15  
16  
17  
18  
19  
20  
21  
22  
23  
24  
25  
26  
27  
28  
29  
30  
31  
32  
33  
34  
35  
36  
37  
38  
39  
40  
41  
42  
43  
44  
45  
46  
47  
48  
49  
50  
51  
52  
53  
54  
55  
56  
57  
58  
59  
60

For peer review only

Table 2. Associations between caregiver factors and caregiver burden

| Factor              | Measure factor               | Outcome caregiver burden | Bivariate analysis | Bivariate association r/t/F/β | Multivariate association β/b (95%CI) | N                  | Ref         |     |    |
|---------------------|------------------------------|--------------------------|--------------------|-------------------------------|--------------------------------------|--------------------|-------------|-----|----|
| <b>Demographics</b> | Age                          | Years                    | VQ burden          | P                             | ns                                   | -                  | 75          | 8   |    |
|                     |                              | Years                    | ZBI                | P or S                        | 0.20*                                | -                  | 101         | 12  |    |
|                     |                              | Years                    | ZBI                | -                             | -                                    | ns                 | 69          | 18  |    |
|                     |                              | Years                    | CDS                | S                             | ns                                   | -                  | 209         | 19  |    |
|                     |                              | Years                    | CDS                | R                             | ns                                   | -                  | 375         | 21  |    |
|                     |                              | Years                    | ZBI                | nr                            | ns                                   | -                  | 109         | 22  |    |
|                     | Gender                       | Male/female              | CDS                | T                             | -2.01*                               | -                  | 209         | 19  |    |
|                     |                              | Mother/father/both       | ZBI                | nr                            | ns                                   | -                  | 109         | 22  |    |
|                     | Education                    | 0-4 level                | ZBI                | -                             | -                                    | ns                 | 69          | 18  |    |
|                     |                              | 0-2 level                | CDS                | A                             | 4.95**                               | 2.61**(1.97-14.09) | 209         | 19  |    |
|                     |                              | Low education            | CDS                | R                             | ns                                   | -                  | 375         | 21  |    |
|                     | Monthly income               | 0-5 level(mother)        | ZBI                | nr                            | ns                                   | -                  | 109         | 22  |    |
|                     |                              | TL                       | ZBI                | -                             | -                                    | ns                 | 69          | 18  |    |
|                     |                              | 0-4 level                | CDS                | A                             | ns                                   | -                  | 209         | 19  |    |
|                     |                              | Low income               | CDS                | R                             | 8.65***                              | 3.69*(-)           | 375         | 21  |    |
|                     |                              | 0-2 level                | ZBI                | nr                            | 4.45*                                | -                  | 109         | 22  |    |
|                     | Number of caregiver          | 1/2                      | ZBI                | nr                            | ns                                   | -                  | 109         | 22  |    |
|                     |                              | Socioeconomic status     | 0-4 level          | CDS                           | A                                    | ns                 | -           | 209 | 19 |
|                     | Geographic area              | Rural area               | CDS                | R                             | 6.27**                               | 5.35**(-)          | 375         | 21  |    |
|                     | Additional helper            | None or present          | ZBI                | -                             | -                                    | ns                 | 69          | 18  |    |
|                     | Daily Carina time            | Hours                    | ZBI                | P or S                        | ns                                   | -                  | 101         | 12  |    |
|                     | <b>Emotional functioning</b> | Anxiety                  | HADS-A             | CDS                           | P                                    | 0.47***            | 0.14***(nr) | 160 | 17 |
|                     |                              |                          | BAI                | ZBI                           | nr                                   | 0.29**             | -           | 109 | 22 |
| Depression          |                              | HADS-A                   | CBS                | P                             | 0.51****                             | -                  | 190         | 24  |    |
|                     |                              | BDI                      | ZBI                | P or S                        | 0.70***                              | -                  | 101         | 12  |    |
|                     |                              | HADS-D                   | CDS                | P                             | 0.51***                              | 0.17***(nr)        | 160         | 17  |    |
|                     |                              | BDI                      | ZBI                | -                             | -                                    | 0.48***(nr)        | 69          | 18  |    |
|                     |                              | BDI-II                   | CDS                | P                             | 0.64***                              | -                  | 203         | 20  |    |
|                     |                              | BDI-II                   | ZBI                | nr                            | 0.41****                             | -                  | 109         | 22  |    |
| Mental health       |                              | HADS-D                   | CBS                | P                             | 0.38****                             | -                  | 190         | 24  |    |
|                     |                              | BDI-II                   | ZBI                | -                             | -                                    | 0.36**(0.17-0.73)  | 62          | 25  |    |
|                     |                              | SF-36-MCS                | ZBI                | P or S                        | ns                                   | -                  | 101         | 12  |    |
|                     |                              | MHI-5                    | BM                 | nr                            | -0.51**                              | -0.20*(nr)         | 93          | 14  |    |
|                     |                              | SF-36-RE                 | BI                 | S                             | ns                                   | -                  | 38          | 15  |    |
| Perceived stress    |                              | SF-36-MH                 | BI                 | S                             | -0.62*                               | -                  | 38          | 15  |    |
|                     |                              | WHOQOL-BREF-PsvH         | CDS                | P                             | -0.68***                             | -                  | 203         | 20  |    |
|                     |                              | PSQ                      | BI                 | S                             | 0.65***                              | -                  | 38          | 15  |    |

|    |                             |                        |            |        |          |                      |     |    |
|----|-----------------------------|------------------------|------------|--------|----------|----------------------|-----|----|
| 1  |                             | PSS-4                  | CDS        | P      | 0.43***  | 0.10***(nr)          | 160 | 17 |
| 2  | Beliefs of                  | RBQ                    | VQ burden  | P      | ns       | -                    | 75  | 8  |
| 3  | Perceived                   | PSQ                    | VQ burden  | P      | -0.25*   | -                    | 75  | 8  |
| 4  |                             | RSCSE                  | ZBI        | -      | -        | -0.19**(-0.31~-0.06) | 62  | 25 |
| 5  | Experiential                | AAQ-16                 | DPC Burden | nr     | 0.42**** | 0.31**(-0.52-1.21)   | 94  | 16 |
| 6  | <b>Physical functioning</b> | PSQI                   | ZBI        | P or S | 0.39***  | -                    | 101 | 12 |
| 7  | Sleep quality               | NRS                    | ZBI        | P or S | 0.36***  | -                    | 101 | 12 |
| 8  | Pain                        | SF-36-BP               | BI         | S      | -0.40*   | -                    | 38  | 15 |
| 9  | Fatigue                     | CIS                    | ZBI        | P or S | 0.66***  | -                    | 101 | 12 |
| 10 | Physical health             | FSS                    | CDS        | P      | 0.40***  | -                    | 203 | 20 |
| 11 |                             | SF-36-PCS              | ZBI        | P or S | -0.21*   | -                    | 101 | 12 |
| 12 |                             | SF-36-PF               | BI         | S      | ns       | -                    | 38  | 15 |
| 13 |                             | SF-36-RP               | BI         | S      | ns       | -                    | 38  | 15 |
| 14 |                             | SF-36-GH               | BI         | S      | -0.44*   | -                    | 38  | 15 |
| 15 |                             | SF-36-VT               | BI         | S      | -0.54*   | -                    | 38  | 15 |
| 16 | <b>Overall health</b>       | WHOQOL-BREF-PH         | CDS        | P      | -0.59*** | -                    | 203 | 20 |
| 17 | Quality of life             | VQ well-being          | VQ burden  | P      | -0.50**  | -                    | 75  | 8  |
| 18 |                             | WHOQOL-8               | BM         | nr     | -0.39**  | -0.16*(nr)           | 93  | 14 |
| 19 | <b>Social functioning</b>   | SF-36-SF               | BI         | S      | -0.61*   | -                    | 38  | 15 |
| 20 | Social functioning          | WHOQOL-BREF-SR         | CDS        | P      | -0.68*** | -                    | 203 | 20 |
| 21 | Environment health          | WHOQOL-BREF-E          | CDS        | P      | -0.63*** | -                    | 203 | 20 |
| 22 | Social support              | SSS                    | BM         | nr     | -0.35**  | -0.41** (nr)         | 93  | 14 |
| 23 | Coping                      | SSQ                    | VQ burden  | P      | ns       | -                    | 75  | 8  |
| 24 |                             | CHIP                   | DPC Burden | nr     | ns       | ns                   | 94  | 16 |
| 25 |                             | Individual coping      | CDS        | R      | ns       | -                    | 375 | 21 |
| 26 |                             | Seeking social support | CDS        | R      | -8.99*** | ns                   | 375 | 21 |
| 27 |                             | Spouse support         | CDS        | R      | -7.44*** | -5.67** (nr)         | 375 | 21 |

HADS: Hospital Anxiety and Depression Scale; HADS-A: HADS-Anxiety Scale; BAI: Beck Anxiety Inventory; BDI: Beck Depression Inventory; HADS-D: HADS-Depression Scale; BDI-II: Beck Depression Inventory-II; SF-36: 36-Item Short Form Health Survey; SF-36-MCS: SF-36-Mental component summary; MHI-5: Mental Health Inventory-short form; SF-36-RE: SF-36-Emotional Role; SF-36-MH: SF-36-Mental health; WHOQOL-BREF: World Health Organization's Quality of Life Questionnaire; WHOQOL-BREF-PsyH: WHOQOL-BREF-Psychological health; PSQ: Perceived self-efficacy in the care questionnaire; PSS-4: Perceived Stress Scale-4 item; RBQ: Adapted rehabilitation belief questionnaire; RSCSE: Revised Scale for Caregiving Self-Efficacy; AAQ-16: Acceptance and Action Questionnaire; PSQI: Pittsburgh sleep quality index; NRS: Numerical rating scale; SF-36-BP: SF-36-Bodily pain; CIS: Multidimensional checklist individual strength; FSS: Fatigue Severity Scale; SF-36-PCS: SF-36-Physical component summary; SF-36-PF: SF-36-Physical functioning; SF-36-RP: SF-36-Physical Role; SF-36-GH: SF-36-General health; SF-36-VT: SF-36-Vitality; WHOQOL-BREF-PH: WHOQOL-BREF-Physical health; VQ well-being: Thai version Viriyaprasart's questionnaire about well-being; WHOQOL-8: The World Health Organization Quality of Life Assessment 8 item index; SF-36-SF: SF-36-Social functioning; WHOQOL-BREF-SR: WHOQOL-BREF-Social relationships; WHOQOL-BREF-E: WHOQOL-BREF-Environment; SSS: Satisfaction with social support scale; SSQ: Adapted social support questionnaire; CHIP: Coping Health Inventory for Parents.

S: Spearman's linear correlation coefficient/ Spearman's Rho correlation; P: Pearson correlation coefficient; A: One-way analysis of variance (ANOVA); T: Independent Student's t-test; R: Univariate regression analysis; nr: not reported; ns: not significant.

\*\*\*\*P < 0.0001, \*\*\*P < 0.001, \*\*P < 0.01, \*P < 0.05.

**Table 3. Associations between children factors and caregiver burden**

|                        | <b>Factor</b>               | <b>Measure factor</b>                                        | <b>Outcome caregiver burden</b> | <b>Bivariate analysis</b> | <b>Bivariate association</b><br>r | <b>Multivariate association</b><br>β/b (95%CI) | <b>N</b> | <b>Ref</b> |
|------------------------|-----------------------------|--------------------------------------------------------------|---------------------------------|---------------------------|-----------------------------------|------------------------------------------------|----------|------------|
| <b>Demographics</b>    | Age                         | Years                                                        | VQ burden                       | P                         | ns                                | -                                              | 75       | 8          |
|                        |                             | Years                                                        | ZBI                             | P or S                    | ns                                | -                                              | 101      | 12         |
|                        |                             | Years                                                        | ZBI                             | -                         | -                                 | ns                                             | 69       | 18         |
|                        |                             | Years                                                        | CDS                             | S                         | ns                                | -                                              | 209      | 19         |
|                        |                             | Years                                                        | CDS                             | R                         | ns                                | -                                              | 375      | 21         |
|                        |                             | 1-5/6-12/>12                                                 | ZBI                             | nr                        | ns                                | -                                              | 109      | 22         |
|                        |                             | Gender                                                       | Male/female                     | ZBI                       | -                                 | -                                              | ns       | 69         |
|                        |                             | Male child                                                   | CDS                             | T                         | 3.02**                            | 0.18**(1.56-8.34)                              | 209      | 19         |
|                        |                             | Male child                                                   | CDS                             | R                         | 3.60*                             | 3.50*(-)                                       | 375      | 21         |
|                        | Birth order                 | 1 <sup>st</sup> /2 <sup>nd</sup> /3 <sup>rd</sup> or greater | CDS                             | A                         | NS                                | -                                              | 209      | 19         |
|                        | Number of Children          | 3 or higher                                                  | ZBI                             | -                         | -                                 | ns                                             | 69       | 18         |
|                        |                             | 1/2/3                                                        | CDS                             | R                         | ns                                | -                                              | 375      | 21         |
|                        |                             | 1/2/3/4 or more                                              | ZBI                             | nr                        | 0.20*                             | -                                              | 109      | 22         |
|                        | Number of disabled children | 1/2 or more                                                  | ZBI                             | nr                        | ns                                | -                                              | 109      | 22         |
| Body mass index        | BMI                         | ZBI                                                          | P or S                          | ns                        | -                                 | 101                                            | 12       |            |
| <b>Disease-related</b> | Type of CP                  | 5 types                                                      | CDS                             | A                         | 3.15*                             | -                                              | 209      | 19         |
|                        |                             | Spastic quadriplegia                                         | CDS                             | R                         | 10.62***                          | -                                              | 375      | 21         |
|                        | Severity of illness         | GMFCS                                                        | ZBI                             | P or S                    | 0.30**                            | -                                              | 101      | 12         |
|                        |                             | Severity of illness scale                                    | ZBI                             | -                         | -                                 | 0.29*(nr)                                      | 69       | 18         |
|                        |                             | GMFCS-ER                                                     | CDS                             | A                         | 6.87***                           | 0.29***(4.42-11.23)                            | 209      | 19         |

|                                |                             |                               |            |    |          |                   |     |    |
|--------------------------------|-----------------------------|-------------------------------|------------|----|----------|-------------------|-----|----|
|                                |                             | nr                            | ZBI        | -  | -        | 0.28*(0.04-0.35)  | 62  | 25 |
|                                | Etiology                    | 7 types                       | CDS        | A  | 2.49*    | -                 | 209 | 19 |
|                                | Additional physical illness | Absent/present                | ZBI        | -  | -        | ns                | 69  | 18 |
|                                | Associated conditions       | 0/1/2/3/4 or more             | CDS        | A  | 3.21*    | -                 | 209 | 19 |
|                                |                             | 0/1 or more                   | CDS        | R  | 12.75*** | ns                | 375 | 21 |
|                                | Functional impairments      | Number of functional deficits | CDS        | R  | 3.97***  | 2.64***(nr)       | 375 | 21 |
| <b>Behavioural functioning</b> | Functional status           | FIM                           | ZBI        | nr | ns       | -                 | 109 | 22 |
|                                | Behavioural problems        | SDQ                           | BM         | nr | 0.24*    | 0.29**            | 93  | 14 |
|                                |                             | SDQ                           | DPC Burden | nr | 0.38**** | 0.27**(0.06-1.43) | 94  | 16 |
| <b>Overall health</b>          | Quality of life             | KIDSCREEN-10                  | BM         | nr | ns       | -                 | 93  | 14 |
|                                |                             | PedsQL                        | ZBI        | P  | 0.40***  | -                 | 120 | 23 |
| <b>Social environment</b>      | Social support              | SSSS                          | BM         | nr | ns       | -0.19*(nr)        | 93  | 14 |
|                                | Environment                 | Space for child locomotion    | ZBI        | P  | nr*      | -                 | 21  | 26 |

BMI: Body mass index; GMFCS: Gross Motor Function Classification System; GMFCS-ER: Gross Motor Function Classification System- Expanded and Revised; FIM: Functional Independence Measure; SDQ: Strengths and Difficulties Questionnaire; KIDSCREEN-10: The shortest version of Kidscreen questionnaires; PedsQL: Pediatric Quality of Life 4.0 Generic Core Scales; SSSS: Satisfaction with social support scale for children and adolescents.

S: Spearman's linear correlation coefficient/ Spearman's Rho correlation; P: Pearson correlation coefficient; A: One-way analysis of variance (ANOVA); T: Independent Student's t-test  
R: Univariate regression analysis; nr: not reported; ns: not significant.

\*\*\*\*P < 0.0001, \*\*\*P < 0.001, \*\*P < 0.01, \*P < 0.05.

Table 4. Adapted GRADE table for potential factors

| Potential factors   | Participant (n) | NO. of studies | Bivariate |   |   | Multivariate |   |   | Grade factors     |               |              |             |                  |                 |  |
|---------------------|-----------------|----------------|-----------|---|---|--------------|---|---|-------------------|---------------|--------------|-------------|------------------|-----------------|--|
|                     |                 |                | +         | 0 | - | +            | 0 | - | Study limitations | Inconsistency | Indirectness | Imprecision | Publication bias | Overall quality |  |
| <b>Caregiver</b>    |                 |                |           |   |   |              |   |   |                   |               |              |             |                  |                 |  |
| Age                 | 938             | 6              | 1         | 4 | 0 | 0            | 1 | 0 | √                 | √             | √            | ×           | √                | Low             |  |
| Education           | 762             | 4              | 1         | 2 | 0 | 1            | 1 | 0 | √                 | ×             | √            | ×           | √                | Low             |  |
| Monthly income      | 762             | 4              | 2         | 1 | 0 | 1            | 1 | 0 | √                 | ×             | √            | ×           | √                | Low             |  |
| Anxiety             | 459             | 3              | 3         | 0 | 0 | 1            | 0 | 0 | √                 | √             | √            | ×           | √                | High            |  |
| Depression          | 894             | 7              | 5         | 0 | 0 | 3            | 0 | 0 | √                 | √             | √            | ×           | √                | High            |  |
| Mental health       | 435             | 4              | 0         | 2 | 3 | 0            | 0 | 1 | √                 | √             | √            | ×           | √                | Moderate        |  |
| Physical health     | 342             | 3              | 0         | 2 | 4 | 0            | 0 | 0 | √                 | √             | √            | ×           | √                | Moderate        |  |
| <b>Children</b>     |                 |                |           |   |   |              |   |   |                   |               |              |             |                  |                 |  |
| Age                 | 938             | 6              | 0         | 5 | 0 | 0            | 1 | 0 | √                 | √             | √            | ×           | √                | Very low        |  |
| Gender              | 653             | 3              | 2         | 0 | 0 | 2            | 1 | 0 | √                 | √             | √            | ×           | √                | Moderate        |  |
| Number of Children  | 553             | 3              | 1         | 1 | 0 | 0            | 1 | 0 | √                 | √             | √            | ×           | √                | Low             |  |
| Severity of illness | 441             | 4              | 2         | 0 | 0 | 3            | 0 | 0 | √                 | √             | √            | ×           | √                | High            |  |

For bivariate and multivariate analyses: +: number of significant associations with a positive value; 0: number of non-significant associations; -: number of significant associations with a negative value; For GRADE factors: √: no serious limitations; ×: serious limitations. For overall quality of evidence: very low, low, moderate, high.



## Discussion

Caring for children with CP is a stressful and difficult task for primary caregivers, especially for their parents. Caregivers of children with CP were under higher pressure than caregivers of healthy children (12,27,28). There were many factors that affect the caregiving burden for children with CP. In our systematic review, we focused on both caregiver characteristics and children characteristics as factors of caregiver burden. There are fewer studies involving children-related factors than caregiver-related factors, possibly because caregiver-related factors are more likely to modify. This review revealed that anxiety, depression, mental health and physical health of caregiver, gender and severity of illness in children with CP were moderate to high quality of evidence for factors contributing to caregiver burden. But our ability to draw conclusions on remaining caregiver and children characteristics as factors is limited because of low to very low quality of evidence.

We found high quality of evidence for the association between caregiver burden and anxiety, depression symptoms of the caregiver. Feelings of anxiety and depression are positively correlated with caregiver burden. The factor for mental health of caregiver as moderate quality of evidence is also a predictor of psychological well-being of the caregiver. Caregivers, who experience poor psychological condition, are more likely to experience high caregiver burden. This correlation between mental health of caregiver and caregiver burden is consistent with the findings in other children with neurodevelopmental diseases, such as epilepsy and autism spectrum disorder (29,30,31). Mother caregivers constitutes the majority of caregiving. Long-term care of children with CP and restricted social activity for the mother caregiver predict more psychological conditions such as depression, distress and stress in them (32). Caregivers who feel depressed experience a greater burden of care, thereby affecting CP children's quality of life (23). A study revealed that psychological interventions such as Stepping Stones Triple P therapy (SSTP), Acceptance and Commitment Therapy (ACT) could improve parental mental wellbeing of parents of children with CP. It is crucial to develop more interventions that focus primarily on the psychological wellbeing of the parents (33).

Moderate quality of evidence was found for the relationship between caregiver burden and physical health of the caregiver. Physical conditions are negatively related to caregiver burden. The worse the physical conditions, the greater the caregiver burden. Children with CP are often accompanied by intellectual and physical disabilities. Daily life care and assistance with rehabilitation exercises mean more physical strength and energy for the caregiver, so that caregivers often experience problems such as body pain, fatigue and sleep problems (12,34,35,36,37), which seriously affect the physical well-being and reduce the quality of life of the caregiver (38,39). Few studies have focused on interventions for caregivers' physical conditions. We should actively pay attention to the physical health of the caregiver and take feasible interventions to improve the physical functioning of caregivers of children with CP.

Many previous studies have explored the correlation between social support and parenting stress in caregivers of children with CP. Negative associations were found between the levels of stress among parents and social support perceived by them (40,41,42,43). Many families faced financial difficulties and restricted access to healthcare services (44,45). Social support from spouses, social organization and medical institution help prevent and decrease the stressful situation of the family's experience in providing care to children with CP (42,46). Although parenting stress and caregiver burden have similar meanings, this review focuses on caregiver burden and involves

1  
2  
3 fewer relevant articles about the association between social support and care burden, so more  
4 evidence is needed to determine their relevance.  
5

6 The factor for severity of illness in CP children as high quality of evidence is positively  
7 correlated with the burden of caregiver. GMFCS score is most commonly used to measure the  
8 severity of disability of children with CP. Children with more severe disabilities require the more  
9 support of their caregivers to carry out the activities of daily living. Caregivers will spend more  
10 time and physical strength to meet the caregiving demands (47,48), and the caregiver burden will  
11 be heavier. In addition, moderate quality of evidence was found for the relationship between  
12 caregiver burden and gender of children with CP. The burden of care for male child is greater than  
13 that of female child, probably because of the greater mobility of male children. At present, there  
14 are many researches on motor function intervention for children with CP. A guideline synthesized  
15 approaches to functional exercise in walking ability and hand mobility in children, indicating  
16 whole-task practice combined with assistive devices could increase independence and reduce  
17 caregiver burden (49).  
18  
19  
20  
21

22 This systematic review offers insight into factors related to caregiver burden and guides the  
23 supportive interventions aiming to reduce caregiver burden, but more additional research into factors  
24 associated with caregiver burden is needed.  
25

## 26 **Strengths and Limitations**

27  
28 This review was the first one to provide a comprehensive overview of caregiver burden of  
29 children with CP. The protocol was registered on the PROSPERO database (CRD42021268284)  
30 and was carried out based on the PRISMA guidelines. The quality of evidence for factors was  
31 judged by the GRADE approach. There were also some limitations of the review. First, the included  
32 literatures used different measurement tools for the burden of care, and the survey details of the total  
33 care burden with/without the burden of each dimension were different. Secondly, due to the uneven  
34 quality of the included studies, the quality of the literature is at a medium level, and convenience  
35 sampling is often used, which has many methodological limitations.  
36  
37  
38  
39

## 40 **Conclusion**

41 Caregivers of children with CP generally have a heavy burden of caregiving, which has affected  
42 the physical, psychological, social and economic conditions of the caregivers. We summarized  
43 factors related to caregiver burden from the aspects of caregiver factors and children factors. The  
44 results revealed that anxiety, depression, mental health and physical health of caregiver, gender  
45 and severity of illness in children with CP were moderate to high quality of evidence for factors  
46 contributing to caregiver burden. At present, the relevant literature on the factors affecting the  
47 caregiver burden of children with CP are mostly cross-sectional studies, and lack of longitudinal  
48 studies with high demonstration efficiency. In the future, we should focus on carrying out  
49 high-quality longitudinal research, and verifying the relevant influencing factors of caregiver  
50 burden of children with CP. Moreover, by identifying all of the factors, healthcare professionals  
51 can provide appropriate assistance to relieve caregiver burden and improve the quality of  
52 caregiving for children with CP.  
53  
54  
55  
56  
57  
58  
59  
60

### Contributor statement

This study was conceived and designed by FL and QS. FL developed the search strategy and performed the literature search. FL and QS performed full-text reviews and extraction of data. FL and MH conducted the statistical analysis with input from QS. FL wrote the first draft. All authors reviewed all drafts and approved the final submitted manuscript. Data extraction and quality assessment adhered to PRISMA guidelines.

### Funding

Funding for the study came from Nursing School of Chongqing Medical University (HLJYK202107).

### Competing interests

All authors have completed the ICMJE uniform disclosure form. The authors have no conflicts of interest to declare.

### Data sharing statement

All data relevant to the study are included in the article or uploaded as supplementary information.

### Ethics statements

#### Patient consent for publication

Not applicable.

#### Ethics approval

This realist synthesis included literature that is available in the public domain and did not involve the collection of personal data.

### References

1. Houtrow AJ, Larson K, Olson LM, Newacheck PW, Halfon N. Changing trends of childhood disability, 2001-2011. *Pediatrics*. 2014 Sep;134(3):530-8.
2. Bax M, Goldstein M, Rosenbaum P, Leviton A, Paneth N, Dan B, Jacobsson B, Damiano D; Executive Committee for the Definition of Cerebral Palsy. Proposed definition and classification of cerebral palsy, April 2005. *Dev Med Child Neurol*. 2005 Aug;47(8):571-6.
3. Odding E, Roebroek ME, Stam HJ. The epidemiology of cerebral palsy: incidence, impairments and risk factors. *Disabil Rehabil*. 2006;28:183-91
4. Elbasan B, Duzgun I, Oskay D. Is There any Difference in Health Related Quality of Life, Self Care and Social Function in Children with Different Disabilities Living in Turkey? *Iran J Pediatr*. 2013 Jun;23(3):281-8.
5. Aisen ML, Kerkovich D, Mast J, Mulroy S, Wren TA, Kay RM, et al. Cerebral palsy: clinical care and neurological rehabilitation. *Lancet Neurol*. 2011;10:844-52.
6. Vargus-Adams J. Parent stress and children with cerebral palsy. *Dev Med Child Neurol*. 2011;53:777.
7. Polack S, Adams M, O'banion D, Baltussen M, Asante S, Kerac M, Gladstone M, Zuurmond M. Children with cerebral palsy in Ghana: malnutrition, feeding challenges, and caregiver quality of life. *Dev Med Child Neurol*. 2018 Sep;60(9):914-921.

- 1
- 2
- 3
- 4
- 5 8. Terathongkum S, Panyatanakun N, Arj-Ong Vallibhakara S. Factors associated with well-being
- 6 of family caregivers of children with cerebral palsy in bangkok. *Journal of the Medical*
- 7 *Association of Thailand*. 2020;103(11):1214-9.
- 8 9. Kasuya RT, Polgar-Bailey P, Takeuchi R. Caregiver burden and burnout. A guide for primary
- 9 care physicians. *Postgrad Med*. 2000 Dec;108(7):119-23.
- 10 10. Ying K, Rostenberghe HV, Kuan G, Mohd Yusoff MHA, Ali SH, Yaacob NS. Health-Related
- 11 Quality of Life and Family Functioning of Primary Caregivers of Children with Cerebral Palsy in
- 12 Malaysia. *Int J Environ Res Public Health*. 2021 Feb 28;18(5):2351.
- 13 11. Vadivelan K, Sekar P, Sruthi SS, Gopichandran V. Burden of caregivers of children with
- 14 cerebral palsy: an intersectional analysis of gender, poverty, stigma, and public policy. *BMC*
- 15 *Public Health*. 2020 May 8;20(1):645.
- 16 12. Albayrak I, Biber A, Çalışkan A, Levendoglu F. Assessment of pain, care burden, depression
- 17 level, sleep quality, fatigue and quality of life in the mothers of children with cerebral palsy. *J*
- 18 *Child Health Care*. 2019 Sep;23(3):483-494.
- 19 13. Farajzadeh A, Maroufizadeh S, Amini M. Factors associated with quality of life among
- 20 mothers of children with cerebral palsy. *Int J Nurs Pract*. 2020 Jun;26(3):e12811.
- 21 14. Carona C, Crespo C, Canavarro MC. Similarities amid the difference: Caregiving burden and
- 22 adaptation outcomes in dyads of parents and their children with and without cerebral palsy.
- 23 *Research in developmental disabilities*. 2013;34(3):882-93.
- 24 15. Bella GP, Garcia MC, Spadari-Bratfisch RC. Salivary cortisol, stress, and health in primary
- 25 caregivers (mothers) of children with cerebral palsy. *Psychoneuroendocrinology*.
- 26 2011;36(6):834-42.
- 27 16. Whittingham K, Wee D, Sanders MR, Boyd R. Predictors of psychological adjustment,
- 28 experienced parenting burden and chronic sorrow symptoms in parents of children with cerebral
- 29 palsy. *Child: care, health and development*. 2013;39(3):366-73.
- 30 17. Farajzadeh A, Dehghanizadeh M, Maroufizadeh S, Amini M, Shamili A. Predictors of mental
- 31 health among parents of children with cerebral palsy during the COVID-19 pandemic in Iran: A
- 32 web-based cross-sectional study. *Research in developmental disabilities*. 2021;112:103890.
- 33 18. Boztepe H, Çınar S, Ay A, Kerimoğlu Yıldız G, Kılıç C. Predictors of caregiver burden in
- 34 mothers of children with leukemia and cerebral palsy. *Journal of psychosocial oncology*.
- 35 2019;37(1):69-78.
- 36 19. Omole JO, Adegoke SA, Omole KO, Mbada CE, Adedeji GA, Adeyemi OA. Levels,
- 37 Correlates, and Predictors of Stress and Caregiver Burden among Caregivers of Children with
- 38 Cerebral Palsy in Nigeria. *Journal of Pediatric Neurology*. 2019;17(1):13-21.
- 39 20. Farajzadeh A, Maroufizadeh S, Amini M. Factors associated with quality of life among
- 40 mothers of children with cerebral palsy. *International journal of nursing practice*.
- 41 2020;26(3):e12811.
- 42 21. Wijesinghe CJ, Cunningham N, Fonseka P, Hewage CG, Østbye T. Factors associated with
- 43 caregiver burden among caregivers of children with cerebral palsy in Sri Lanka. *Asia-Pacific*
- 44 *journal of public health*. 2015;27(1):85-95.
- 45 22. Barutcu A, Barutcu S, Kolkiran S, Ozdener F. Evaluation of Anxiety, Depression and Burden
- 46 on Caregivers of Children with Cerebral Palsy. *Developmental neurorehabilitation*. 2021.
- 47 23. Ozkan Y. Child's quality of life and mother's burden in spastic cerebral palsy: a topographical
- 48 classification perspective. *Journal of International Medical Research*. 2018;46(8):3131-7.
- 49 24. Gugala B. Caregiver burden versus intensity of anxiety and depression symptoms in parents of
- 50 children with cerebral palsy as well as factors potentially differentiating the level of burden: a
- 51 cross-sectional study (Poland). *BMJ open*. 2021;11(6):e036494.
- 52 25. Marrón EM, Redolar-Ripoll D, Boixadós M, Nieto R, Guillamón N, Hernández E, et al.
- 53 Burden on caregivers of children with cerebral palsy: Predictors and related factors. *Universitas*
- 54 *Psychologica*. 2013;12(3):767-78.
- 55 26. Santos AAS, Araújo JA, Vargas MM, Oliveira CCC. The influence of household environment
- 56 on caregivers' overload of children with cerebral paralysis. *Acta Scientiarum - Health Sciences*.
- 57 2012;34(SPL.):315-20.
- 58 27. Ramanandi VH, Rao B. COMPARISON OF STRESS LEVELS IN THE PARENTS OF
- 59 CHILDREN WITH CEREBRAL PALSY AND PARENTS OF NORMAL CHILDREN IN
- 60

- VADODARA REGION OF GUJARAT. *International Journal of Physiotherapy*. 2015;2(2):421-8.
28. Wang HY, Jong YJ. Parental stress and related factors in parents of children with cerebral palsy. *Kaohsiung Journal of Medical Sciences*. 2004;20(7):334-40.
29. Pokharel R, Poudel P, Lama S, Thapa K, Sigdel R, Shrestha E. Burden and Its Predictors among Caregivers of Patient with Epilepsy. *J Epilepsy Res*. 2020 Jun 30;10(1):24-30.
30. Lerthattasilp T, Chareernboon T, Chunsuwan I, Siriumpunkul P. Depression and burden among caregivers of children with autistic spectrum disorder. *J Med Assoc Thai*. 2015 Mar;98 Suppl 2:S45-52.
31. Singh P, Ghosh S, Nandi S. Subjective Burden and Depression in Mothers of Children with Autism Spectrum Disorder in India: Moderating Effect of Social Support. *J Autism Dev Disord*. 2017 Oct;47(10):3097-3111.
32. Barreto TM, Bento MN, Barreto TM, Jagersbacher JG, Jones NS, Lucena R, Bandeira ID. Prevalence of depression, anxiety, and substance-related disorders in parents of children with cerebral palsy: a systematic review. *Dev Med Child Neurol*. 2020 Feb;62(2):163-168.
33. Irwin L, Jesmont C, Basu A. A systematic review and meta-analysis of the effectiveness of interventions to improve psychological wellbeing in the parents of children with cerebral palsy. *Res Dev Disabil*. 2019;95:103511.
34. Czupryna K, Nowotny-Czupryna O, Nowotny J. Back pain in mothers of cerebral palsied children. *Ortop Traumatol Rehabil*. 2014 Sep-Oct;16(5):497-505.
35. Garip Y, Ozel S, Tuncer OB, Kilinc G, Seckin F, Arasil T. Fatigue in the mothers of children with cerebral palsy. *Disabil Rehabil*. 2017 Apr;39(8):757-762.
36. Lang CP, Boucaut A, Guppy M, Johnston LM. Children with cerebral palsy: A cross-sectional study of their sleep and their caregiver's sleep quality, psychological health and well-being. *Child Care Health Dev*. 2021 Nov;47(6):859-868.
37. Gokcin Eminel A, Kahraman T, Genc A. Physical workload during caregiving activities and related factors among the caregivers of children with cerebral palsy. *Ir J Med Sci*. 2021 May;190(2):701-709.
38. Kaya K, Unsal-Delialioglu S, Ordu-Gokkaya NK, Ozisler Z, Ergun N, Ozel S, Ucan H. Musculo-skeletal pain, quality of life and depression in mothers of children with cerebral palsy. *Disabil Rehabil*. 2010;32(20):1666-72.
39. Raina P, O'Donnell M, Rosenbaum P, Brehaut J, Walter SD, Russell D, Swinton M, Zhu B, Wood E. The health and well-being of caregivers of children with cerebral palsy. *Pediatrics*. 2005 Jun;115(6):e626-36.
40. Wang Y, Huang Z, Kong F. Parenting stress and life satisfaction in mothers of children with cerebral palsy: The mediating effect of social support. *J Health Psychol*. 2020 Mar;25(3):416-425.
41. Lima MBS, Dos Santos Cardoso V, Da Costa Silva SS. Parental stress and social support of caregivers of children with cerebral palsy. *Paideia*. 2016;26(64):207-14.
42. Alias NA, Azizan N, Azizan NA. Relationship between Level of Stress and Social Support among Parents of Children with Cerebral Palsy. *Environment-Behaviour Proceedings Journal*. 2020;5(14):105-10.
43. Gordon A, Lang C, Larkin R, Johnston LM. Effect of social support services on the emotional well-being of caregivers of children with cerebral palsy. *Developmental medicine and child neurology*. 2012;54:62-3.
44. Ismail A, Sk Abd Razak R, Suddin LS, Mahmud A, Kamaralzaman S, Yusri G. The Economic Burden and Determinant Factors of Parents/Caregivers of Children with Cerebral Palsy in Malaysia: A Mixed Methods Study. *Int J Environ Res Public Health*. 2022 Jan 1;19(1):475.
45. Ribeiro MF, Sousa AL, Vandenberghe L, Porto CC. Parental stress in mothers of children and adolescents with cerebral palsy. *Rev Lat Am Enfermagem*. 2014 May-Jun;22(3):440-7.
46. Al-Gamal E, Long T. Psychological distress and perceived support among Jordanian parents living with a child with cerebral palsy: a cross-sectional study. *Scand J Caring Sci*. 2013 Sep;27(3):624-31.
47. Sawyer, M. G., et al. (2011). Time demands of caring for children with cerebral palsy: what are the implications for maternal mental health? *Dev Med Child Neurol* 53(4): 338-343.
48. Gokcin Eminel A, Kahraman T, Genc A. Physical workload during caregiving activities and related factors among the caregivers of children with cerebral palsy[J]. *Ir J Med Sci*,

1  
2  
3  
4  
5 2021,190(2):701-709.

6 49. Jackman M, Sakzewski L, Morgan C, Boyd RN, Brennan SE, Langdon K, Toovey RAM,  
7 Greaves S, Thorley M, Novak I. Interventions to improve physical function for children and  
8 young people with cerebral palsy: international clinical practice guideline. Dev Med Child Neurol.  
9 2022 May;64(5):536-549.

10  
11  
12  
13  
14  
15  
16  
17  
18  
19  
20  
21  
22  
23  
24  
25  
26  
27  
28  
29  
30  
31  
32  
33  
34  
35  
36  
37  
38  
39  
40  
41  
42  
43  
44  
45  
46  
47  
48  
49  
50  
51  
52  
53  
54  
55  
56  
57  
58  
59  
60

For peer review only

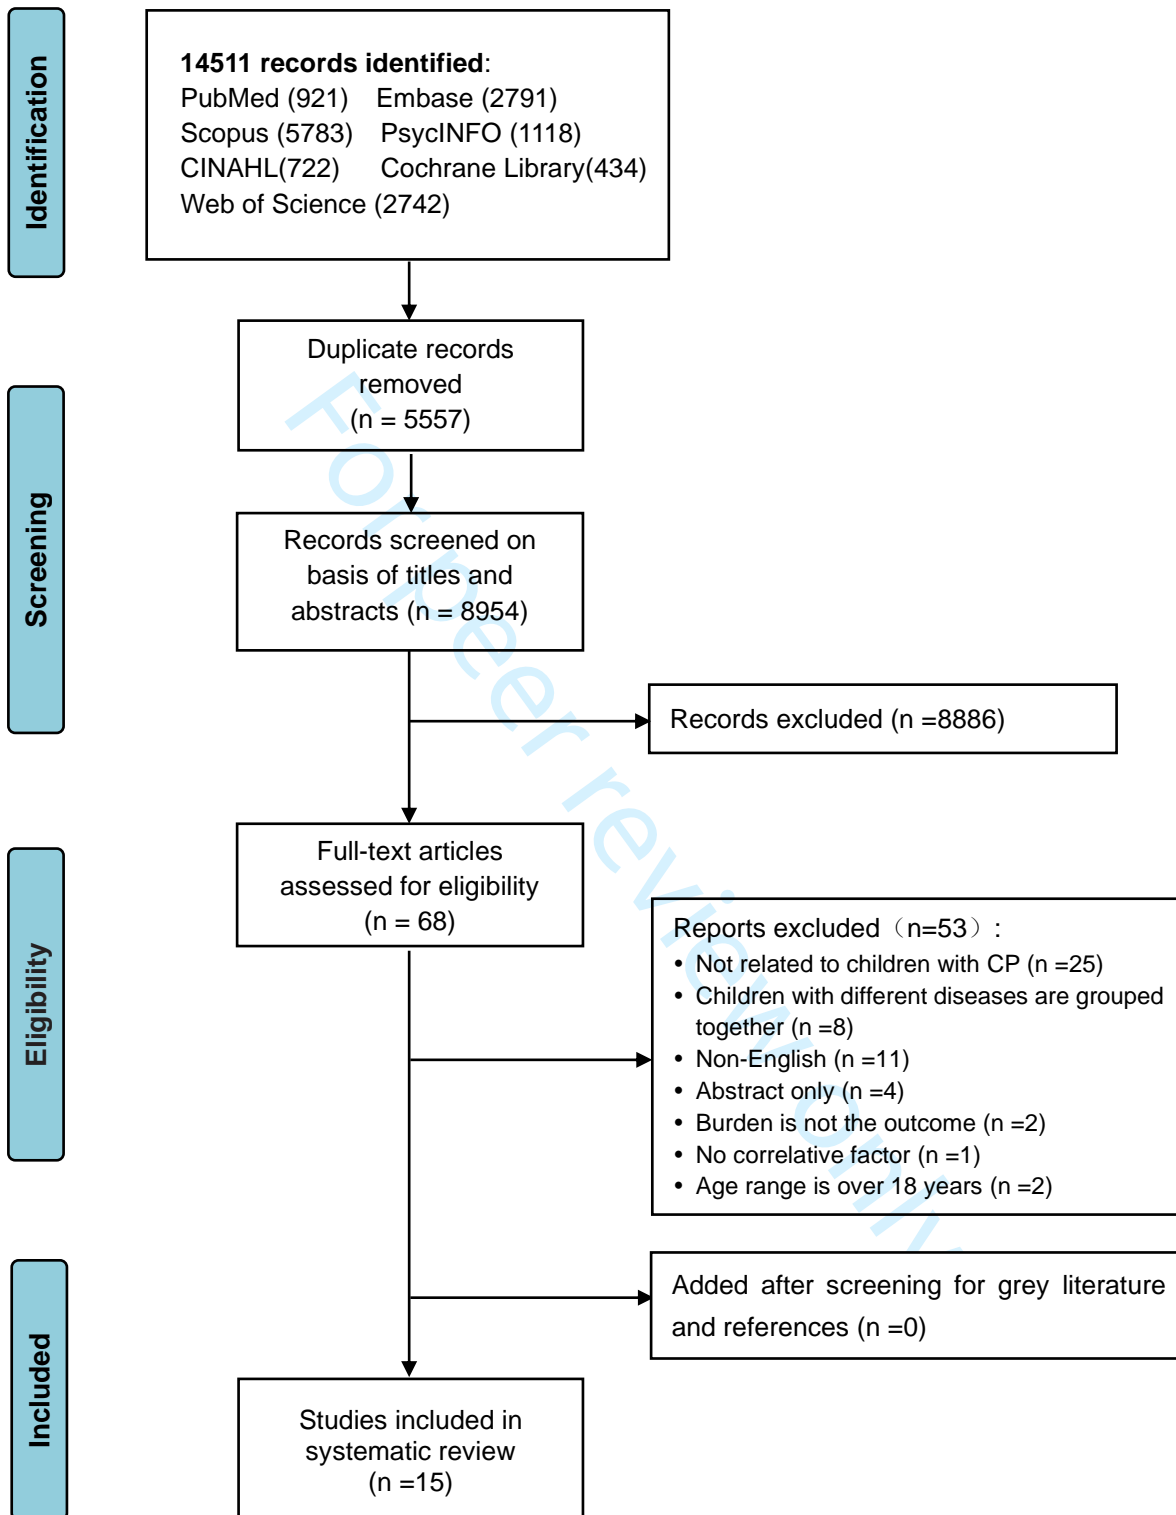

**Figure 1.** Flow diagram for a systematic literature review on caregiver burden in children with cerebral palsy

## Appendix 1-1 PRISMA Checklist

| Section and Topic             | Item # | Checklist item                                                                                                                                                                                                                                                                                       | Reported on page # |
|-------------------------------|--------|------------------------------------------------------------------------------------------------------------------------------------------------------------------------------------------------------------------------------------------------------------------------------------------------------|--------------------|
| <b>TITLE</b>                  |        |                                                                                                                                                                                                                                                                                                      |                    |
| Title                         | 1      | Identify the report as a systematic review.                                                                                                                                                                                                                                                          | Title page         |
| <b>ABSTRACT</b>               |        |                                                                                                                                                                                                                                                                                                      |                    |
| Abstract                      | 2      | See the PRISMA 2020 for Abstracts checklist.                                                                                                                                                                                                                                                         | See table below    |
| <b>INTRODUCTION</b>           |        |                                                                                                                                                                                                                                                                                                      |                    |
| Rationale                     | 3      | Describe the rationale for the review in the context of existing knowledge.                                                                                                                                                                                                                          | 3                  |
| Objectives                    | 4      | Provide an explicit statement of the objective(s) or question(s) the review addresses.                                                                                                                                                                                                               | 3                  |
| <b>METHODS</b>                |        |                                                                                                                                                                                                                                                                                                      |                    |
| Eligibility criteria          | 5      | Specify the inclusion and exclusion criteria for the review and how studies were grouped for the syntheses.                                                                                                                                                                                          | 3-4                |
| Information sources           | 6      | Specify all databases, registers, websites, organisations, reference lists and other sources searched or consulted to identify studies. Specify the date when each source was last searched or consulted.                                                                                            | 3                  |
| Search strategy               | 7      | Present the full search strategies for all databases, registers and websites, including any filters and limits used.                                                                                                                                                                                 | Appendix 2         |
| Selection process             | 8      | Specify the methods used to decide whether a study met the inclusion criteria of the review, including how many reviewers screened each record and each report retrieved, whether they worked independently, and if applicable, details of automation tools used in the process.                     | 4                  |
| Data collection process       | 9      | Specify the methods used to collect data from reports, including how many reviewers collected data from each report, whether they worked independently, any processes for obtaining or confirming data from study investigators, and if applicable, details of automation tools used in the process. | 4                  |
| Data items                    | 10a    | List and define all outcomes for which data were sought. Specify whether all results that were compatible with each outcome domain in each study were sought (e.g. for all measures, time points, analyses), and if not, the methods used to decide which results to collect.                        | 4                  |
|                               | 10b    | List and define all other variables for which data were sought (e.g. participant and intervention characteristics, funding sources). Describe any assumptions made about any missing or unclear information.                                                                                         | 4                  |
| Study risk of bias assessment | 11     | Specify the methods used to assess risk of bias in the included studies, including details of the tool(s) used, how many reviewers assessed each study and whether they worked independently, and if applicable, details of automation tools used in the process.                                    | 4                  |
| Effect measures               | 12     | Specify for each outcome the effect measure(s) (e.g. risk ratio, mean difference) used in the synthesis or presentation of results.                                                                                                                                                                  | 4                  |
| Synthesis methods             | 13a    | Describe the processes used to decide which studies were eligible for each synthesis (e.g. tabulating the study intervention characteristics and comparing against the planned groups for each synthesis (item #5)).                                                                                 | 4                  |
|                               | 13b    | Describe any methods required to prepare the data for presentation or synthesis, such as handling of missing summary statistics, or data conversions.                                                                                                                                                | 4                  |
|                               | 13c    | Describe any methods used to tabulate or visually display results of individual studies and syntheses.                                                                                                                                                                                               | 4                  |
|                               | 13d    | Describe any methods used to synthesize results and provide a rationale for the choice(s). If meta-analysis was performed, describe the model(s), method(s) to identify the presence and extent of statistical heterogeneity, and software package(s) used.                                          | 4                  |
|                               | 13e    | Describe any methods used to explore possible causes of heterogeneity among study results (e.g. subgroup analysis, meta-regression).                                                                                                                                                                 | Not applicable     |



| Section and Topic                              | Item # | Checklist item                                                                                                                                                                                                                                                                       | Reported on page # |
|------------------------------------------------|--------|--------------------------------------------------------------------------------------------------------------------------------------------------------------------------------------------------------------------------------------------------------------------------------------|--------------------|
|                                                | 13f    | Describe any sensitivity analyses conducted to assess robustness of the synthesized results.                                                                                                                                                                                         | 4                  |
| Reporting bias assessment                      | 14     | Describe any methods used to assess risk of bias due to missing results in a synthesis (arising from reporting biases).                                                                                                                                                              | 4                  |
| Certainty assessment                           | 15     | Describe any methods used to assess certainty (or confidence) in the body of evidence for an outcome.                                                                                                                                                                                | 4                  |
| <b>RESULTS</b>                                 |        |                                                                                                                                                                                                                                                                                      |                    |
| Study selection                                | 16a    | Describe the results of the search and selection process, from the number of records identified in the search to the number of studies included in the review, ideally using a flow diagram.                                                                                         | Figure 1           |
|                                                | 16b    | Cite studies that might appear to meet the inclusion criteria, but which were excluded, and explain why they were excluded.                                                                                                                                                          | Figure 1           |
| Study characteristics                          | 17     | Cite each included study and present its characteristics.                                                                                                                                                                                                                            | Table 1            |
| Risk of bias in studies                        | 18     | Present assessments of risk of bias for each included study.                                                                                                                                                                                                                         | Appendix 5         |
| Results of individual studies                  | 19     | For all outcomes, present, for each study: (a) summary statistics for each group (where appropriate) and (b) an effect estimate and its precision (e.g. confidence/credible interval), ideally using structured tables or plots.                                                     | Table 1            |
| Results of syntheses                           | 20a    | For each synthesis, briefly summarise the characteristics and risk of bias among contributing studies.                                                                                                                                                                               | Not applicable     |
|                                                | 20b    | Present results of all statistical syntheses conducted. If meta-analysis was done, present for each the summary estimate and its precision (e.g. confidence/credible interval) and measures of statistical heterogeneity. If comparing groups, describe the direction of the effect. | Table 2 and 3      |
|                                                | 20c    | Present results of all investigations of possible causes of heterogeneity among study results.                                                                                                                                                                                       | Not applicable     |
|                                                | 20d    | Present results of all sensitivity analyses conducted to assess the robustness of the synthesized results.                                                                                                                                                                           | Not applicable     |
| Reporting biases                               | 21     | Present assessments of risk of bias due to missing results (arising from reporting biases) for each synthesis assessed.                                                                                                                                                              | Table 4            |
| Certainty of evidence                          | 22     | Present assessments of certainty (or confidence) in the body of evidence for each outcome assessed.                                                                                                                                                                                  | Table 4            |
| <b>DISCUSSION</b>                              |        |                                                                                                                                                                                                                                                                                      |                    |
| Discussion                                     | 23a    | Provide a general interpretation of the results in the context of other evidence.                                                                                                                                                                                                    | 16-17              |
|                                                | 23b    | Discuss any limitations of the evidence included in the review.                                                                                                                                                                                                                      | 17                 |
|                                                | 23c    | Discuss any limitations of the review processes used.                                                                                                                                                                                                                                | 17                 |
|                                                | 23d    | Discuss implications of the results for practice, policy, and future research.                                                                                                                                                                                                       | 17                 |
| <b>OTHER INFORMATION</b>                       |        |                                                                                                                                                                                                                                                                                      |                    |
| Registration and protocol                      | 24a    | Provide registration information for the review, including register name and registration number, or state that the review was not registered.                                                                                                                                       | 3                  |
|                                                | 24b    | Indicate where the review protocol can be accessed, or state that a protocol was not prepared.                                                                                                                                                                                       | Not described      |
|                                                | 24c    | Describe and explain any amendments to information provided at registration or in the protocol.                                                                                                                                                                                      | Not described      |
| Support                                        | 25     | Describe sources of financial or non-financial support for the review, and the role of the funders or sponsors in the review.                                                                                                                                                        | 18                 |
| Competing interests                            | 26     | Declare any competing interests of review authors.                                                                                                                                                                                                                                   | 18                 |
| Availability of data, code and other materials | 27     | Report which of the following are publicly available and where they can be found: template data collection forms; data extracted from included studies; data used for all analyses; analytic code; any other materials used in the review.                                           | 18                 |

## Appendix 1-2 PRISMA 2020 for Abstracts Checklist

| Section and Topic       | Item # | Checklist item                                                                                                                                                                                                                                                                                        | Reported (Yes/No) |
|-------------------------|--------|-------------------------------------------------------------------------------------------------------------------------------------------------------------------------------------------------------------------------------------------------------------------------------------------------------|-------------------|
| <b>TITLE</b>            |        |                                                                                                                                                                                                                                                                                                       |                   |
| Title                   | 1      | Identify the report as a systematic review.                                                                                                                                                                                                                                                           | Yes               |
| <b>BACKGROUND</b>       |        |                                                                                                                                                                                                                                                                                                       |                   |
| Objectives              | 2      | Provide an explicit statement of the main objective(s) or question(s) the review addresses.                                                                                                                                                                                                           | Yes               |
| <b>METHODS</b>          |        |                                                                                                                                                                                                                                                                                                       |                   |
| Eligibility criteria    | 3      | Specify the inclusion and exclusion criteria for the review.                                                                                                                                                                                                                                          | Yes               |
| Information sources     | 4      | Specify the information sources (e.g. databases, registers) used to identify studies and the date when each was last searched.                                                                                                                                                                        | Yes               |
| Risk of bias            | 5      | Specify the methods used to assess risk of bias in the included studies.                                                                                                                                                                                                                              | Yes               |
| Synthesis of results    | 6      | Specify the methods used to present and synthesise results.                                                                                                                                                                                                                                           | Yes               |
| <b>RESULTS</b>          |        |                                                                                                                                                                                                                                                                                                       |                   |
| Included studies        | 7      | Give the total number of included studies and participants and summarise relevant characteristics of studies.                                                                                                                                                                                         | Yes               |
| Synthesis of results    | 8      | Present results for main outcomes, preferably indicating the number of included studies and participants for each. If meta-analysis was done, report the summary estimate and confidence/credible interval. If comparing groups, indicate the direction of the effect (i.e. which group is favoured). | Yes               |
| <b>DISCUSSION</b>       |        |                                                                                                                                                                                                                                                                                                       |                   |
| Limitations of evidence | 9      | Provide a brief summary of the limitations of the evidence included in the review (e.g. study risk of bias, inconsistency and imprecision).                                                                                                                                                           | Yes               |
| Interpretation          | 10     | Provide a general interpretation of the results and important implications.                                                                                                                                                                                                                           | Yes               |
| <b>OTHER</b>            |        |                                                                                                                                                                                                                                                                                                       |                   |
| Funding                 | 11     | Specify the primary source of funding for the review.                                                                                                                                                                                                                                                 | Yes               |
| Registration            | 12     | Provide the register name and registration number.                                                                                                                                                                                                                                                    | Yes               |

## Appendix 2 Literature Search

### Medline (via PubMed) search strategy August 2021

("caregiver"[MeSH Terms] OR "parents"[Title/Abstract] OR "mother"[Title/Abstract] OR "care\*"[Title/Abstract]) AND ("caregiver burden"[MeSH Terms] OR "stress"[Title/Abstract] OR "strain"[Title/Abstract] OR "burnout"[Title/Abstract]) AND ("cerebral palsy"[MeSH Terms] OR "CP"[Title/Abstract] OR "disability\*"[Title/Abstract] OR ("neurodev\*"[All Fields] AND "disorder\*"[Title/Abstract])) AND ("child"[MeSH Terms] OR "child\*"[Title/Abstract] OR "paediatr\*"[Title/Abstract])

### Embase search strategy August 2021

('caregiver burden'/exp OR 'caregiver burden':ti,ab,kw OR stress:ti,ab,kw OR 'strain':ti,ab,kw OR 'burnout':ti,ab,kw) AND ('caregiver'/exp OR caregiver:ti,ab,kw OR care\*:ti,ab,kw OR parents:ti,ab,kw OR mother:ti,ab,kw) AND ('cerebral palsy'/exp OR 'cerebral palsy':ti,ab,kw OR 'neurodev\* disorder\*':ti,ab,kw OR disability\*:ti,ab,kw) AND ('child'/exp OR children:ti,ab,kw OR child\*:ti,ab,kw OR paediatr\*:ti,ab,kw)

**Appendix 3:**

**JBI Critical Appraisal Checklist for Analytical Cross Sectional Studies**

| Item                                                                        | Yes                      | No                       | Unclear                  | Not applicable           |
|-----------------------------------------------------------------------------|--------------------------|--------------------------|--------------------------|--------------------------|
| 1. Were the criteria for inclusion in the sample clearly defined?           | <input type="checkbox"/> | <input type="checkbox"/> | <input type="checkbox"/> | <input type="checkbox"/> |
| 2. Were the study subjects and the setting described in detail?             | <input type="checkbox"/> | <input type="checkbox"/> | <input type="checkbox"/> | <input type="checkbox"/> |
| 3. Was the exposure measured in a valid and reliable way?                   | <input type="checkbox"/> | <input type="checkbox"/> | <input type="checkbox"/> | <input type="checkbox"/> |
| 4. Were objective, standard criteria used for measurement of the condition? | <input type="checkbox"/> | <input type="checkbox"/> | <input type="checkbox"/> | <input type="checkbox"/> |
| 5. Were confounding factors identified?                                     | <input type="checkbox"/> | <input type="checkbox"/> | <input type="checkbox"/> | <input type="checkbox"/> |
| 6. Were strategies to deal with confounding factors stated?                 | <input type="checkbox"/> | <input type="checkbox"/> | <input type="checkbox"/> | <input type="checkbox"/> |
| 7. Were the outcomes measured in a valid and reliable way?                  | <input type="checkbox"/> | <input type="checkbox"/> | <input type="checkbox"/> | <input type="checkbox"/> |
| 8. Was appropriate statistical analysis used?                               | <input type="checkbox"/> | <input type="checkbox"/> | <input type="checkbox"/> | <input type="checkbox"/> |

Overall appraisal:    Include             Exclude             Seek further info

Comments (Including reason for exclusion)

\_\_\_\_\_

#### Appendix 4: GRADE factors

| Item | GRADE factor      | Criteria<br>(No serious limitation = ✓, serious limitation=✗)                                                                                                                                                                            |
|------|-------------------|------------------------------------------------------------------------------------------------------------------------------------------------------------------------------------------------------------------------------------------|
| 1.   | Study limitations | No serious limitation, if at least 75% of the studies are moderate- (total score 3-5) to high quality (total score 6-8) studies based on the JBI Critical Appraisal Checklist.                                                           |
| 2.   | Inconsistency     | No serious limitation, if the point of effect estimates are not on either side of the line of no effect.                                                                                                                                 |
| 3.   | Indirectness      | No serious limitation, if at least 75% of the studies used a study sample that fully represents the review question.                                                                                                                     |
| 4.   | Imprecision       | No serious limitation, if 75% of the studies applied the rule of thumb: univariate ratio [n:K] exceeds [20:1] and if multivariate ratio [n:K] exceeds [10:1]. In which n represents the sample size and K the number of studied factors. |
| 5.   | Publication bias  | No serious limitation, if the factor is investigated in 3 or more studies.                                                                                                                                                               |

## Appendix 5: Quality Assessment List

| References              | Item 1 | Item 2 | Item 3 | Item 4 | Item 5 | Item 6 | Item 7 | Item 8 | Total |
|-------------------------|--------|--------|--------|--------|--------|--------|--------|--------|-------|
| Carona (2013) [14]      | 1      | 1      | 0.5    | 1      | 1      | 1      | 0.5    | 1      | 7     |
| Bella (2011) [15]       | 1      | 1      | 0.5    | 1      | 1      | 1      | 0.5    | 1      | 7     |
| Whittingham (2012) [16] | 1      | 1      | 1      | 1      | 0.5    | 0.5    | 1      | 1      | 7     |
| Farajzadeh (2021) [17]  | 1      | 1      | 1      | 0.5    | 0.5    | 1      | 1      | 1      | 7     |
| Boztepe (2018) [18]     | 1      | 1      | 1      | 0.5    | 1      | 1      | 1      | 1      | 7.5   |
| Omole (2017) [19]       | 1      | 1      | 0.5    | 1      | 0.5    | 1      | 0.5    | 1      | 6.5   |
| Terathongkum (2020) [8] | 1      | 0      | 1      | 0.5    | 0.5    | 0.5    | 1      | 1      | 5.5   |
| Farajzadeh (2020) [20]  | 1      | 1      | 1      | 0.5    | 0.5    | 1      | 1      | 1      | 7     |
| Wijesinghe (2015) [21]  | 0.5    | 0      | 1      | 0.5    | 0.5    | 0      | 1      | 1      | 4.5   |
| Barutcu (2021) [22]     | 1      | 1      | 1      | 1      | 0.5    | 0      | 1      | 1      | 6.5   |
| Ozkan (2018) [23]       | 1      | 1      | 0.5    | 1      | 0.5    | 0      | 0.5    | 1      | 5.5   |
| Gugała (2021) [24]      | 1      | 1      | 1      | 1      | 0.5    | 1      | 1      | 1      | 7.5   |
| Marrón (2013) [25]      | 1      | 0      | 0.5    | 0.5    | 0.5    | 1      | 0.5    | 1      | 5     |
| Albayrak (2019) [12]    | 1      | 1      | 0.5    | 0.5    | 1      | 1      | 0.5    | 1      | 6.5   |
| Santos (2012) [26]      | 1      | 0      | 0.5    | 0.5    | 0.5    | 0      | 0.5    | 1      | 4     |

1= Yes; 0= NO; 0.5= Unclear

# BMJ Open

## Factors associated with caregiver burden among family caregivers of children with cerebral palsy: A systematic review

|                                 |                                                                                                                                                                                                                |
|---------------------------------|----------------------------------------------------------------------------------------------------------------------------------------------------------------------------------------------------------------|
| Journal:                        | <i>BMJ Open</i>                                                                                                                                                                                                |
| Manuscript ID                   | bmjopen-2022-065215.R1                                                                                                                                                                                         |
| Article Type:                   | Original research                                                                                                                                                                                              |
| Date Submitted by the Author:   | 10-Feb-2023                                                                                                                                                                                                    |
| Complete List of Authors:       | Liu, Fang; Chongqing Medical University<br>Shen, Qiao; Chongqing Medical University Affiliated Children's Hospital,<br>Huang, Miao; Chongqing Medical University<br>Zhou, Hengyu; Chongqing Medical University |
| <b>Primary Subject Heading</b>: | Paediatrics                                                                                                                                                                                                    |
| Secondary Subject Heading:      | Neurology, Rehabilitation medicine                                                                                                                                                                             |
| Keywords:                       | Developmental neurology & neurodisability < PAEDIATRICS, PRIMARY CARE, REHABILITATION MEDICINE                                                                                                                 |
|                                 |                                                                                                                                                                                                                |

SCHOLARONE™  
Manuscripts



I, the Submitting Author has the right to grant and does grant on behalf of all authors of the Work (as defined in the below author licence), an exclusive licence and/or a non-exclusive licence for contributions from authors who are: i) UK Crown employees; ii) where BMJ has agreed a CC-BY licence shall apply, and/or iii) in accordance with the terms applicable for US Federal Government officers or employees acting as part of their official duties; on a worldwide, perpetual, irrevocable, royalty-free basis to BMJ Publishing Group Ltd ("BMJ") its licensees and where the relevant Journal is co-owned by BMJ to the co-owners of the Journal, to publish the Work in this journal and any other BMJ products and to exploit all rights, as set out in our [licence](#).

The Submitting Author accepts and understands that any supply made under these terms is made by BMJ to the Submitting Author unless you are acting as an employee on behalf of your employer or a postgraduate student of an affiliated institution which is paying any applicable article publishing charge ("APC") for Open Access articles. Where the Submitting Author wishes to make the Work available on an Open Access basis (and intends to pay the relevant APC), the terms of reuse of such Open Access shall be governed by a Creative Commons licence – details of these licences and which [Creative Commons](#) licence will apply to this Work are set out in our licence referred to above.

Other than as permitted in any relevant BMJ Author's Self Archiving Policies, I confirm this Work has not been accepted for publication elsewhere, is not being considered for publication elsewhere and does not duplicate material already published. I confirm all authors consent to publication of this Work and authorise the granting of this licence.



1  
2  
3 **Title:** Factors associated with caregiver burden among family caregivers of children  
4 with cerebral palsy: A systematic review  
5

6 **Running title:** Caregiver burden of children with cerebral palsy  
7

8 **List of all authors:**  
9

10 Fang Liu, Nursing School of Chongqing Medical University, Chongqing, China  
11

12 Qiao Shen, Children's Hospital of Chongqing Medical University, Chongqing, China  
13

14 Miao Huang, Nursing School of Chongqing Medical University, Chongqing, China  
15

16 Hengyu Zhou, Nursing School of Chongqing Medical University, Chongqing, China  
17

18 **First author:**  
19

20 Fang Liu, Lecturer  
21

22 Email: fangliu@cqmu.edu.cn  
23

24 Tel: +8613637926609  
25

26 **Corresponding author:**  
27

28 Prof. Hengyu Zhou  
29

30 E-mail: zhouhengyu@cqmu.edu.cn  
31

32 Chongqing Medical University, No. 1 Medical College Road, Yuzhong District,  
33 Chongqing, China  
34

35 **Key words:** caregiver burden, cerebral palsy, systematic review  
36  
37  
38  
39  
40

41 **Words count:** 2865  
42

43 **Number of figures and tables:** 1 figure, 4 tables  
44  
45  
46  
47  
48  
49  
50  
51  
52  
53  
54  
55  
56  
57  
58  
59  
60

## Abstract

**Objectives:** To identify caregiver and children factors associated with caregiver burden on primary caregivers of children with cerebral palsy.

**Design:** Systematic review

**Data sources:** Seven electronic databases, including PubMed, Cochrane Library, Scopus, PsycINFO, Web of Science, CINAHL and Embase, were systematically searched up to February 1, 2023.

**Eligibility criteria:** Original observational studies reporting caregiver burden and related factors among caregivers of children with cerebral palsy.

**Data abstraction and synthesis:** Two reviewers independently screened results and assessed the quality of studies. Title, abstract, full-text screening and data abstraction were done independently by two reviewers. Risk of bias was assessed using the JBI Critical Appraisal Checklist for Analytical Cross-Sectional Studies. The quality of evidence for factors was rated using the Grading of Recommendations Assessment, Development and Evaluation (GRADE) approach.

**Results:** 16 articles were included in the review. All studies were cross-sectional and examined caregiver-reported burden measures. The Zarit Burden Interview was the most commonly used questionnaire. Depression of caregiver and severity of illness in children with CP were moderate quality of evidence for factors contributing to caregiver burden.

**Conclusions:** Higher caregiver burden is associated with more depressive feelings and worse life quality of the caregiver, and with more severe physical disability of the children. Future studies should focus on high-quality longitudinal research and appropriate assistance to reduce caregiver burden and improve the quality of caregiving for children with CP.

**Key words:** caregiver burden, cerebral palsy, systematic review

**PROSPERO** 2021 CRD: 42021268284

### Strengths and limitations of this study:

- This review was the first one to provide a comprehensive overview of caregiver burden of children with CP.
- The protocol was registered on the PROSPERO database (CRD42021268284) and was carried out based on the PRISMA guidelines.
- The quality of evidence for factors was judged by the GRADE approach.
- Many survey factors of the total care burden were scattered and failed to provide reliable evidence.
- The uneven quality of the included studies resulted in many methodological limitations.

## Introduction

With the development of perinatal medicine and obstetric technology, the birth prevalence of cerebral palsy in high-income countries had declined to 1.6 per 1000 live births, while the prevalence in low- and middle-income countries was as high as 3.4 per 1000 live births (1). Cerebral palsy (CP) is defined as a group of disorders of the development of movement and posture, causing activity limitation, that are attributed to non-progressive disturbances occurred in the developing fetal or infant brain. The motor disorders of CP are often accompanied by disturbances of sensation, cognition, communication, perception, behaviour, and by a seizure disorder (2). CP is the most common paediatric disability, seriously affecting the children's self-care ability and social activities (3, 4). Thus, Children with CP often require lifetime extensive care and rehabilitation training, which will bring heavy psychological, physical and economic burden to their families (5, 6).

Parents, as the primary caregivers of children with disabilities, bear the arduous caregiving burden. Not only do they have to help the children's daily activities, but they also need to pay close attention to their changing health conditions, which directly leads to changes in the caregivers' lifestyle and a decline in their quality of life (7, 8). Caregiver burden has been defined as a multidimensional response to physical, emotional, psychological, and financial stressors that are associated with caregiving experience (9). Studies have shown that a high level of caregiving burden for children with CP negatively affects the mental and physical health, family functions and social interactions of caregivers, resulting in low quality of care and unmet patient needs (10, 11, 12, 13). Paying attention to the burden of caregivers is of great significance.

Relevant factors that affect caregiver burden should be studied in order to propose interventions to support caregivers. In the last decade, there has been an increasing number of studies on the care burden for children with CP, but a comprehensive review of caregiver factors and patient factors influencing caregiver burden is lacking. Therefore, the objective of this study was to systematically review published literature to identify caregiver and patient factors of caregiver burden among primary caregivers of children with CP.

## Methods

This systematic review was checked through the Preferred Reporting Items for Systematic Reviews and Meta-Analyses (PRISMA) guidelines (Appendix 1). The protocol has been registered with PROSPERO 2021 CRD 42021268284.

## Search strategy

The electronic databases PubMed, Cochrane Library, Scopus, PsycINFO, Web of Science, CINAHL and Embase were systematically searched from inception to February 1, 2023. The search string contained four groups of combinations of medical subject headings and text words: Caregiver (MeSH term), care\*, parents or mother; Caregiver burden (MeSH term), stress, strain or burnout; Cerebral palsy (MeSH term), CP, disability\* or neurodev\* disorder\*; Children (MeSH term), child\* or paediatr\* (Appendix 2). Additionally, we also searched for grey literature using the first 500 hits from Google Scholar and Open Grey. References for relevant publications were checked to make sure that no relevant papers had been missed.

## Inclusion & Exclusion criteria

1  
2  
3 Original observational studies reporting burden and related factors of caregivers of children with  
4 CP were taken as the primary focus of the research; Study participants need to be primary  
5 caregivers (over 18 years old) of children (0-18 years old) with cerebral palsy. Burden had to be  
6 assessed with a total caregiver burden construct; Full-text articles published in English or with an  
7 English translation in peer-reviewed journals were included. Studies where caregivers of children  
8 with different diagnoses and children with adults are grouped together were excluded, unless  
9 results were reported separately for caregivers of children with CP. Intervention studies, reviews,  
10 non-original research papers, qualitative research studies were not eligible for this review.  
11  
12  
13

### 14 **Data extraction and Quality assessment**

15  
16 The titles/abstracts of citations retrieved using the search strategy were independently assessed by  
17 two reviewers. The full text articles of potentially relevant studies were then independently  
18 screened by two reviewers, and any discrepancies were resolved through discussion. The number  
19 of studies excluded during each screening phase, and the reasons for full-text exclusion will be  
20 described in a PRISMA flow diagram. A pre-specified form will be used for the extraction of the  
21 data from the included studies. This procedure will be completed by one reviewer, and verified by  
22 a second reviewer, with any disagreements being resolved through discussion with a third-party  
23 reviewer. We extracted the following data from each included study independently by two  
24 researchers: first authors, year of publication, sample size, study design, relevant participant  
25 demographics, key predictor and outcome variables, self-administered tools used for  
26 measurement, results and associations.  
27  
28  
29

30 Risk of bias was assessed using the JBI Critical Appraisal Checklist for Analytical  
31 Cross-Sectional Studies (Appendix 3) by the two researchers independently. The checklists  
32 include 8 questions to evaluate the overall quality of the studies from the research object, disease,  
33 measurement of influencing factors and confounding factors, data analysis, etc. The choices of  
34 answers were 'yes', 'no', 'unclear' or 'not applicable'. The overall appraisal of 'include',  
35 'exclude' or 'seek further information' were presented in the last section of the checklist.  
36  
37  
38

### 39 **Data synthesis**

40  
41 Due to the diversity of outcome measures and factors included in the study, a meta-analysis was  
42 not possible. Bivariate associations were described in terms of different statistical analysis.  
43 Multivariate associations were described as standardized or Unstandardized coefficients ( $\beta$  or  $b$ ).  
44 In studies that applied a logistic regression, the odds ratio ( $OR$ ) was presented. Factors were  
45 grouped into caregiver and children characteristics subsequently thematically categorized.  
46  
47

### 48 **Quality of evidence**

49  
50 We assessed the quality of evidence for each factor measured in at least three studies using the  
51 Grading of Recommendations Assessment, Development and Evaluation (GRADE) approach  
52 (Appendix 4). GRADE has four levels of evidence: very low, low, moderate, and high. Evidence  
53 from observational data starts at low quality. For each of study limitation in risk of bias,  
54 imprecision, inconsistency, indirectness, and publication bias, researchers have the option of  
55 rating down their level of certainty in evidence. Quality of evidence also can be rated up for "large  
56 effect" or "dose effect".  
57  
58  
59

### 60 **Patient and public involvement**

1  
2  
3 Patients or public were not involved in the conduct of this systematic review.  
4

## 5 **Results**

### 6 **Search and screening**

7  
8  
9 The search identified a total of 16754 possibly relevant articles. After the removal of duplicates  
10 and the abstract screening, a total of 80 studies were selected for full-text review. Finally, 16  
11 studies were left for full inclusion in the review. There were no additional articles met the  
12 inclusion criteria when searching the references of the 16 articles. The PRISMA flow diagram for  
13 search and screening results are shown in Figure 1.  
14  
15

### 16 **Risk of bias**

17 Risk of bias scores for studies ranged from 4 to 7 out of a maximum of 8 points. Some articles  
18 lacked clear information in items: study subjects and the setting, exposure factors, and  
19 confounding bias. The methodological quality assessment list was listed in supplementary  
20 Appendix 5.  
21  
22

### 23 **Characteristics of the included studies**

24  
25 The 16 included studies reported on overall caregiver burden and related factors of children with  
26 CP. Studies were conducted in eleven different countries between 2011 and 2022, involving in  
27 3109 caregivers (not inclusive of controls). Of these, 14 studies investigated univariate  
28 associations; 9 studies were explored in multivariate associations. Caregivers were predominantly  
29 female, and 5 of the 16 articles had samples made up exclusively of mothers. 6 articles involved  
30 fathers. The mean age of caregivers varied from 31 to 42 years. Four studies involved control  
31 populations, two of four had caregivers of healthy children as the control group. All studies were  
32 cross-sectional surveys. The most used sampling method was convenience sampling. The key  
33 characteristics of each study are presented in Table 1.  
34  
35  
36  
37  
38  
39  
40  
41  
42  
43  
44  
45  
46  
47  
48  
49  
50  
51  
52  
53  
54  
55  
56  
57  
58  
59  
60

**Table 1. The summary of included studies**

| Authors (Year)                          | Country   | Design                     | Caregiver sample size | Caregiver relation to child | Mean age of Caregivers M(SD) | Age of children (years) | Measures tool |
|-----------------------------------------|-----------|----------------------------|-----------------------|-----------------------------|------------------------------|-------------------------|---------------|
| Carona et al. (2013) <sup>14</sup>      | Portugal  | Cross-sectional Study      | 93                    | Mothers (83.8%)             | 42.34(5.72)                  | 8-18                    | BM            |
| Bella et al. (2011) <sup>15</sup>       | Brazil    | Cross-sectional Study      | 38                    | Mothers (-)                 | 33.3(7.7)                    | 4-11                    | BI            |
| Whittingham et al. (2013) <sup>16</sup> | Australia | Correlational survey study | 94                    | Mothers (90.4%)             | -                            | 2-12                    | DPC Burden    |
| Farajzadeh et al. (2021) <sup>17</sup>  | Iran      | Cross-sectional study      | 160                   | Female (84.4%)              | 35.47(6.59)                  | 2-14                    | CDS           |
| Boztepe et al. (2019) <sup>18</sup>     | Turkey    | Cross-sectional Study      | 69                    | Mothers (100%)              | 34.6(7.3)                    | 1-18                    | ZBI           |
| Omole et al. (2019) <sup>19</sup>       | Nigeria   | Cross-sectional Study      | 209                   | Female (91.9%)              | 34.6(9.2)                    | 1-12                    | CDS           |
| Terathongkum et al. (2020) <sup>8</sup> | Thailand  | correlational research     | 75                    | Female (88.0%)              | -                            | 0-18                    | VQ burden     |
| Farajzadeh et al. (2020) <sup>20</sup>  | Iran      | Cross-sectional Study      | 203                   | Mothers (100%)              | 34.48(6.74)                  | 4-14                    | CDS           |
| Wijesinghe et al. (2015) <sup>21</sup>  | Sri Lanka | Cross-sectional Study      | 375                   | Mothers (97%)               | 32.4(7.2)                    | 1-12                    | CDS           |
| Barutcu et al. (2021) <sup>22</sup>     | Turkey    | Cross-sectional Study      | 109                   | Mothers (98.2%)             | 38.53(9.62)                  | 1-18                    | ZBI           |
| Ozkan et al. (2018) <sup>23</sup>       | Turkey    | Cross-sectional Study      | 120                   | Mothers (100%)              | -                            | 2-18                    | ZBI           |
| Gugala et al. (2021) <sup>24</sup>      | Poland    | Cross-sectional Study      | 190                   | Female (72.6%)              | 40.6(9.1)                    | 2-18                    | CBS           |
| Marrón et al. (2013) <sup>25</sup>      | Spanish   | Cross-sectional Study      | 62                    | Mothers (88.7%)             | 41.98(5.64)                  | 1-17                    | ZBI           |
| Albayrak et al. (2019) <sup>12</sup>    | Turkey    | Cross-sectional Study      | 101                   | Mothers (100%)              | 34.93(8.7)                   | 0-18                    | ZBI           |
| Santos et al. (2012) <sup>26</sup>      | Brazil    | Cross-sectional Study      | 21                    | Female (100%)               | 31(-)                        | 1-12                    | ZBI           |
| Moriwaki et al. (2022) <sup>27</sup>    | Japan     | Cross-sectional Study      | 1190                  | Mothers (100%)              | 37.97(5.28)                  | 1-12                    | ZBI           |

BM: The Revised Burden Measure; BI: The Burden Interview; DPC Burden =Daily Parenting Tasks Checklist-Parenting Burden; ZBI: Zarit Burden Interview;

CDS: Caregiver Difficulties Scale; VQ burden: Thai version Viriyaprasart's questionnaire about burden of care; CBS: Caregiver Burden Scale.

## Measures of burden

Seven instruments were used to measure caregiver burden including Zarit Burden Interview ( $n= 7$ ) (12,18,22-23,25-27); Caregiver Difficulties Scale ( $n= 4$ ) (17,19,20-21); Caregiver Burden Scale ( $n= 1$ ) (24); The Revised Burden Measure ( $n= 1$ ) (14); The Burden Interview ( $n= 1$ ) (15); Daily Parenting Tasks Checklist-Parenting Burden ( $n= 1$ ) (16); Viriyaprasart's questionnaire about burden of care ( $n= 1$ ) (8).

## Studied factors in relation to caregiver burden

Overviews of caregiver and children characteristics as factors of caregiver burden are presented in Tables 2 and 3. The detailed description is described as follows.

### Caregiver factors

Caregiver factors were grouped into five categories, including caregiver demographics, emotional functioning, physical functioning, overall health and social functioning. Caregiver demographical factors included age (8,12,18-19,21-22), gender (19), educational level (18-19,21-22), monthly income (18-19,21-22), number of caregiver (22), socioeconomic status (19), geographic area (21), mother employment (27), additional helper (18), daily caring time (12). Emotional functioning factors included anxiety (17,22,24), depression (12,17-18,20,22,24-25), mental health (12,14-15,20), perceived stress (15,17), beliefs of rehabilitation (8), perceived self-efficacy (8,25), experiential avoidance (16). This category was included in eleven of the 15 studies. Physical functioning factors included sleep quality (12), pain (12,15), fatigue (12,20), physical health (12,15,20). Overall health factors included quality of life (8,14). Social functioning factors included social functioning (15,20), environment health (20), social support (8,14,27), coping (16,21).

### Children factors

Children factors were grouped into five categories, including children demographics, disease-related, behavioural functioning, overall health and social environment. Children demographical factors included age (8,12,18-19,21-22), gender (18,19,21-22), going to nursery/school (27), residence (27), birth order (19), number of children (18,21-22), number of disabled child (22), body mass index (12). Disease-related factors included type of CP (19,21), severity of CP (12,18,19,25), tube/intravenous nutrition (27), etiology (19), additional physical illness (18), associated conditions (19,21), functional impairments (21). This category was included in five of the 15 studies. Behavioural functioning factors included functional status (22), behavioural problems (14,16). Overall health and social environment factors included quality of life (14,23), social support (14) and environment (26).

## Quality of evidence for potential factors

Quality of evidence for potential factors of caregiver burden are presented in Supplementary Table. The criteria for compelling evidence are that each factor was measured in at least three studies reported significant relationships. The details are as follows.

### Caregiver factors

The results of evidence synthesis for caregiver factors using the GRADE criteria were that

1  
2  
3 “depression” was the moderate quality of evidence for factor of caregiver burden. “Age”,  
4 “anxiety” and “fatigue” of caregivers was the low quality of evidence for factors of caregiver  
5 burden. Very low quality of evidence was found for the relationship between caregiver burden and  
6 “education”, “monthly income”, “mental health”, “physical health” and “social support” of  
7 caregivers.  
8  
9

### 10 **Children factors**

11 The synthesis of the evidence for children factors resulted in moderate quality of evidence  
12 between caregiver burden and “severity of illness”. The factors for “age” and “gender” of  
13 children, “number of Children” were the low quality of evidence for the relations with caregiver  
14 burden. Few of the included studies have explored children factors, and fewer factors have been  
15 able to perform evidence synthesis.  
16  
17  
18  
19  
20  
21  
22  
23  
24  
25  
26  
27  
28  
29  
30  
31  
32  
33  
34  
35  
36  
37  
38  
39  
40  
41  
42  
43  
44  
45  
46  
47  
48  
49  
50  
51  
52  
53  
54  
55  
56  
57  
58  
59  
60



**Table 2. Associations between caregiver factors and caregiver burden**

|                         | Factor                    | Measure factor    | Outcome caregiver burden | Bivariate analysis | Bivariate association r/t/F/β/Z | Multivariate association β/b (95%CI) | N   | Ref |    |
|-------------------------|---------------------------|-------------------|--------------------------|--------------------|---------------------------------|--------------------------------------|-----|-----|----|
| Demographics            | Age                       | Years             | VQ burden                | P                  | ns                              | -                                    | 75  | 8   |    |
|                         |                           | Years             | ZBI                      | P or S             | 0.20*                           | -                                    | 101 | 12  |    |
|                         |                           | Years             | ZBI                      | -                  | -                               | ns                                   | -   | 69  | 18 |
|                         |                           | Years             | CDS                      | S                  | ns                              | -                                    | 209 | 19  |    |
|                         |                           | Years             | CDS                      | R                  | ns                              | -                                    | 375 | 21  |    |
|                         |                           | Years             | ZBI                      | P or S             | ns                              | -                                    | 109 | 22  |    |
|                         | Gender                    | Male/female       | CDS                      | T                  | -2.01*                          | -                                    | 209 | 19  |    |
|                         | Education                 | 0-4 level         | ZBI                      | -                  | -                               | ns                                   | 69  | 18  |    |
|                         |                           | 0-2 level         | CDS                      | A                  | 4.95**                          | 2.61**(1.97-14.09)                   | 209 | 19  |    |
|                         |                           | Low education     | CDS                      | R                  | ns                              | -                                    | 375 | 21  |    |
|                         |                           | 0-5 level(mother) | ZBI                      | P or S             | ns                              | -                                    | 109 | 22  |    |
|                         | Monthly income            | TI                | ZBI                      | -                  | -                               | ns                                   | 69  | 18  |    |
|                         |                           | 0-4 level         | CDS                      | A                  | ns                              | -                                    | 209 | 19  |    |
|                         |                           | Low income        | CDS                      | R                  | 8.65***                         | 3.69*(-)                             | 375 | 21  |    |
|                         |                           | 0-2 level         | ZBI                      | P or S             | 4.45*                           | -                                    | 109 | 22  |    |
|                         | Number of careqiver       | 1/2               | ZBI                      | P or S             | ns                              | -                                    | 109 | 22  |    |
|                         | Socioeconomic status      | 0-4 level         | CDS                      | A                  | ns                              | -                                    | 209 | 19  |    |
| Geographic area         | Rural area                | CDS               | R                        | 6.27**             | 5.35**(-)                       | 375                                  | 21  |     |    |
| Mother employment       | Yes/No                    | ZBI               | U                        | ns                 | -                               | 1190                                 | 27  |     |    |
| Additional helper       | None or present           | ZBI               | -                        | -                  | ns                              | 69                                   | 18  |     |    |
| Daily Carina time       | Hours                     | ZBI               | P or S                   | ns                 | -                               | 101                                  | 12  |     |    |
| Emotional functioning   | Anxiety                   | HADS-A            | CDS                      | P                  | 0.47***                         | 0.14***(nr)                          | 160 | 17  |    |
|                         |                           | BAI               | ZBI                      | P or S             | 0.29**                          | -                                    | 109 | 22  |    |
|                         |                           | HADS-A            | CBS                      | P                  | 0.51****                        | -                                    | 190 | 24  |    |
|                         | Depression                | BDI               | ZBI                      | P or S             | 0.70***                         | -                                    | 101 | 12  |    |
|                         |                           | HADS-D            | CDS                      | P                  | 0.51***                         | 0.17***(nr)                          | 160 | 17  |    |
|                         |                           | BDI               | ZBI                      | -                  | -                               | 0.48***(nr)                          | 69  | 18  |    |
|                         |                           | BDI-II            | CDS                      | P                  | 0.64***                         | -                                    | 203 | 20  |    |
|                         |                           | BDI-II            | ZBI                      | P or S             | 0.41****                        | -                                    | 109 | 22  |    |
|                         |                           | HADS-D            | CBS                      | P                  | 0.38****                        | -                                    | 190 | 24  |    |
|                         | Mental health             | BDI-II            | ZBI                      | -                  | -                               | 0.36**(0.17-0.73)                    | 62  | 25  |    |
|                         |                           | SF-36-MCS         | ZBI                      | P or S             | ns                              | -                                    | 101 | 12  |    |
|                         |                           | MHI-5             | BM                       | nr                 | -0.51**                         | -0.20*(nr)                           | 93  | 14  |    |
|                         |                           | SF-36-RE          | BI                       | S                  | ns                              | -                                    | 38  | 15  |    |
|                         |                           | SF-36-MH          | BI                       | S                  | -0.62*                          | -                                    | 38  | 15  |    |
|                         | Perceived stress          | WHOQOL-BREF-PsvH  | CDS                      | P                  | -0.68***                        | -                                    | 203 | 20  |    |
|                         |                           | PSQ               | BI                       | S                  | 0.65***                         | -                                    | 38  | 15  |    |
|                         | Beliefs of rehabilitation | PSS-4             | CDS                      | P                  | 0.43***                         | 0.10***(nr)                          | 160 | 17  |    |
| RBO                     |                           | VQ burden         | P                        | ns                 | -                               | 75                                   | 8   |     |    |
| Perceived self-efficacy | PSQ                       | VQ burden         | P                        | -0.25*             | -                               | 75                                   | 8   |     |    |
|                         | RSCSE                     | ZBI               | -                        | -                  | -0.19**(-0.31~-0.06)            | 62                                   | 25  |     |    |
| Experiential avoidance  | AAQ-16                    | DPC Burden        | nr                       | 0.42****           | 0.31**(0.52-1.21)               | 94                                   | 16  |     |    |
| Physical                | Sleep quality             | PSQI              | ZBI                      | P or S             | 0.39***                         | -                                    | 101 | 12  |    |

|                        |                                             |                |            |          |             |            |             |    |
|------------------------|---------------------------------------------|----------------|------------|----------|-------------|------------|-------------|----|
| functioning            | Pain                                        | NRS            | ZBI        | P or S   | 0.36***     | -          | 101         | 12 |
|                        |                                             | SF-36-BP       | BI         | S        | -0.40*      | -          | 38          | 15 |
|                        | Fatigue/ Vitality                           | CIS            | ZBI        | P or S   | 0.66***     | -          | 101         | 12 |
|                        |                                             | FSS            | CDS        | P        | 0.40***     | -          | 203         | 20 |
|                        |                                             | SF-36-VT       | BI         | S        | -0.54*      | -          | 38          | 15 |
|                        | Physical health                             | SF-36-PCS      | ZBI        | P or S   | -0.21*      | -          | 101         | 12 |
|                        |                                             | SF-36-PF       | BI         | S        | ns          | -          | 38          | 15 |
|                        |                                             | SF-36-RP       | BI         | S        | ns          | -          | 38          | 15 |
| SF-36-GH               |                                             | BI             | S          | -0.44*   | -           | 38         | 15          |    |
| WHOQOL-BREF-PH         |                                             | CDS            | P          | -0.59*** | -           | 203        | 20          |    |
| Overall health         | Quality of life                             | VQ well-being  | VQ burden  | P        | -0.50**     | -          | 75          | 8  |
|                        |                                             | WHOQOL-8       | BM         | nr       | -0.39**     | -0.16*(nr) | 93          | 14 |
| Social functioning     | Social functioning                          | SF-36-SF       | BI         | S        | -0.61*      | -          | 38          | 15 |
|                        |                                             | WHOQOL-BREF-SR | CDS        | P        | -0.68***    | -          | 203         | 20 |
|                        | Environment health                          | WHOQOL-BREF-E  | CDS        | P        | -0.63***    | -          | 203         | 20 |
|                        |                                             | Social support | SSS        | BM       | nr          | -0.35**    | -0.41**(nr) | 93 |
|                        | SSQ                                         |                | VQ burden  | P        | ns          | -          | 75          | 8  |
|                        | Family support                              |                | ZBI        | U        | ns          | -          | 1190        | 27 |
|                        | Others support                              |                | ZBI        | U        | nr**        | -          | 1190        | 27 |
|                        | Home-visit nursing                          |                | ZBI        | C        | nr**        | -          | 1190        | 27 |
|                        | Home care                                   |                | ZBI        | C        | nr*         | -          | 1190        | 27 |
|                        | Home-visit rehabilitation                   |                | ZBI        | C        | nr**        | -          | 1190        | 27 |
|                        | Training & treatment                        |                | ZBI        | C        | ns          | -          | 1190        | 27 |
|                        | Short stay                                  |                | ZBI        | C        | ns          | -          | 1190        | 27 |
|                        | Mobility support                            |                | ZBI        | C        | nr*         | -          | 1190        | 27 |
|                        | Transportation services                     |                | ZBI        | C        | ns          | -          | 1190        | 27 |
|                        | No social support usage                     |                | ZBI        | C        | nr*         | -          | 1190        | 27 |
|                        | Satisfaction with home-visit nursing        |                | ZBI        | C        | ns          | -          | 1190        | 27 |
|                        | Satisfaction with home care                 |                | ZBI        | C        | nr*         | ns         | 1190        | 27 |
|                        | Satisfaction with home-visit rehabilitation |                | ZBI        | C        | nr**        | ns         | 1190        | 27 |
|                        | Satisfaction with training & treatment      |                | ZBI        | C        | nr**        | ns         | 1190        | 27 |
|                        | Satisfaction with short stay                | ZBI            | C          | nr**     | -0.29*      | 1190       | 27          |    |
|                        | Satisfaction with mobility support          | ZBI            | C          | ns       | -           | 1190       | 27          |    |
|                        | Satisfaction with transportation services   | ZBI            | C          | ns       | -           | 1190       | 27          |    |
|                        | Coping                                      | CHIP           | DPC Burden | nr       | ns          | ns         | 94          | 16 |
| Individual coping      |                                             | CDS            | R          | ns       | -           | 375        | 21          |    |
| Seeking social support |                                             | CDS            | R          | -8.99*** | ns          | 375        | 21          |    |
| Spouse support         |                                             | CDS            | R          | -7.44*** | -5.67**(nr) | 375        | 21          |    |

HADS: Hospital Anxiety and Depression Scale; HADS-A: HADS-Anxiety Scale; BAI: Beck Anxiety Inventory; BDI: Beck Depression Inventory; HADS-D: HADS-Depression Scale; BDI-II: Beck Depression Inventory-II; SF-36: 36-Item Short Form Health Survey; SF-36-MCS: SF-36-Mental component summary; MHI-5: Mental Health Inventory-short form; SF-36-RE: SF-36-Emotional Role; SF-36-MH: SF-36-Mental health; WHOQOL-BREF: World Health Organization's Quality of Life Questionnaire; WHOQOL-BREF-PsyH: WHOQOL-BREF-Psychological health; PSQ: Perceived self-efficacy in the care questionnaire; PSS-4: Perceived Stress Scale-4 item; RBQ: Adapted rehabilitation belief questionnaire; RSCSE: Revised Scale for Caregiving Self-Efficacy; AAQ-16: Acceptance and Action Questionnaire; PSQI: Pittsburgh sleep quality index; NRS: Numerical rating scale; SF-36-BP: SF-36-Bodily pain; CIS: Multidimensional checklist individual strength; FSS: Fatigue Severity Scale; SF-36-VT: SF-36-Vitality; SF-36-PCS: SF-36-Physical component summary; SF-36-PF: SF-36-Physical functioning; SF-36-RP: SF-36-Physical Role; SF-36-GH: SF-36-General health; WHOQOL-BREF-PH: WHOQOL-BREF-Physical health; VQ well-being: Thai version Viriyaprasart's questionnaire about well-being; WHOQOL-8: The World Health Organization Quality of Life Assessment 8 item index; SF-36-SF: SF-36-Social functioning; WHOQOL-BREF-SR: WHOQOL-BREF-Social relationships; WHOQOL-BREF-E: WHOQOL-BREF-Environment; SSS: Satisfaction with social support scale; SSQ: Adapted social support questionnaire; CHIP: Coping Health Inventory for Parents.

S: Spearman's linear correlation coefficient/ Spearman's Rho correlation; P: Pearson correlation coefficient; A: One-way analysis of variance (ANOVA); T: Independent Student's t-test; R: Univariate regression analysis; U: Mann-Whitney U; C: Chi-squared test; nr: not reported; ns: not significant.

\*\*\*\*P<0.0001, \*\*\*P<0.001, \*\*P<0.01, \*P<0.05.

**Table 3. Associations between children factors and caregiver burden**

|                     | Factor                  | Measure factor                                               | Outcome caregiver burden | Bivariate analysis | Bivariate association<br>r/t/F/β/Z/H/X <sup>2</sup> | Multivariate association<br>β/b (95%CI) | N    | Ref |
|---------------------|-------------------------|--------------------------------------------------------------|--------------------------|--------------------|-----------------------------------------------------|-----------------------------------------|------|-----|
| <b>Demographics</b> | Age                     | Years                                                        | VQ burden                | P                  | ns                                                  | -                                       | 75   | 8   |
|                     |                         | Years                                                        | ZBI                      | P or S             | ns                                                  | -                                       | 101  | 12  |
|                     |                         | Years                                                        | ZBI                      | -                  | -                                                   | ns                                      | 69   | 18  |
|                     |                         | Years                                                        | CDS                      | S                  | ns                                                  | -                                       | 209  | 19  |
|                     |                         | Years                                                        | CDS                      | R                  | ns                                                  | -                                       | 375  | 21  |
|                     |                         | 1-5/6-12/>12 years old                                       | ZBI                      | P or S             | ns                                                  | -                                       | 109  | 22  |
|                     |                         | Years                                                        | ZBI                      | U                  | ns                                                  | -                                       | 1190 | 27  |
|                     | Gender                  | Male/female                                                  | ZBI                      | -                  | -                                                   | ns                                      | 69   | 18  |
|                     |                         | Male child                                                   | CDS                      | T                  | 3.02**                                              | 0.18**(1.56-8.34)                       | 209  | 19  |
|                     |                         | Male child                                                   | CDS                      | R                  | 3.60*                                               | 3.50*(-)                                | 375  | 21  |
|                     |                         | Male/female                                                  | CBS                      | P or S             | ns                                                  | -                                       | 109  | 22  |
|                     | Going to nursery/school | Yes/No                                                       | ZBI                      | U                  | ns                                                  | -                                       | 1190 | 27  |
|                     | Residence               | Urban/Rural                                                  | ZBI                      | U                  | nr****                                              | -                                       | 1190 | 27  |
|                     | Birth order             | 1 <sup>st</sup> /2 <sup>nd</sup> /3 <sup>rd</sup> or greater | CDS                      | A                  | ns                                                  | -                                       | 209  | 19  |
|                     |                         | First/or not                                                 | ZBI                      | U                  | ns                                                  | -                                       | 1190 | 27  |
|                     | Number of Children      | 3 or higher                                                  | ZBI                      | -                  | -                                                   | ns                                      | 69   | 18  |
|                     |                         | 1/2/3                                                        | CDS                      | R                  | ns                                                  | -                                       | 375  | 21  |
|                     |                         | 1/2/3/4 or more                                              | ZBI                      | P or S             | 0.20*                                               | -                                       | 109  | 22  |
|                     |                         | 1/or not                                                     | ZBI                      | U                  | ns                                                  | -                                       | 1190 | 27  |
|                     | Number of disabled      | 1/or not                                                     | ZBI                      | P or S             | ns                                                  | -                                       | 109  | 22  |
| Body mass index     | BMI                     | ZBI                                                          | P or S                   | ns                 | -                                                   | 101                                     | 12   |     |

|                                |                               |                            |            |         |             |                     |      |    |
|--------------------------------|-------------------------------|----------------------------|------------|---------|-------------|---------------------|------|----|
| <b>Disease-related</b>         | Type of CP                    | 5 types                    | CDS        | A       | 3.15*       | -                   | 209  | 19 |
|                                |                               | Spastic quadriplegia       | CDS        | R       | 10.62***    | -                   | 375  | 21 |
|                                | Severity of illness           | GMFCS                      | ZBI        | P or S  | 0.30**      | -                   | 101  | 12 |
|                                |                               | Severity of illness scale  | ZBI        | -       | -           | 0.29*(nr)           | 69   | 18 |
|                                |                               | GMFCS-ER                   | CDS        | A       | 6.87***     | 0.29***(4.42-11.23) | 209  | 19 |
|                                |                               | nr                         | ZBI        | -       | -           | 0.28*(0.04-0.35)    | 62   | 25 |
|                                |                               | 3 levels                   | ZBI        | H       | nr**        | ns                  | 1190 | 27 |
|                                | Tube/intravenous nutrition    | Yes/No                     | ZBI        | C       | nr*         | ns                  | 1190 | 27 |
|                                | Etiology                      | 7 types                    | CDS        | A       | 2.49*       | -                   | 209  | 19 |
|                                | Additional physical illness   | Absent/present             | ZBI        | -       | -           | ns                  | 69   | 18 |
|                                | Associated conditions         | 0/1/2/3/4 or more          | CDS        | A       | 3.21*       | -                   | 209  | 19 |
|                                |                               | 0/1 or more                | CDS        | R       | 12.75***    | ns                  | 375  | 21 |
| Functional impairments         | Number of functional deficits | CDS                        | R          | 3.97*** | 2.64***(nr) | 375                 | 21   |    |
| <b>Behavioural functioning</b> | Functional status             | FIM                        | ZBI        | P or S  | ns          | -                   | 109  | 22 |
|                                | Behavioural problems          | SDQ                        | BM         | nr      | 0.24*       | 0.29**              | 93   | 14 |
|                                |                               | SDQ                        | DPC Burden | nr      | 0.38****    | 0.27**(0.06-1.43)   | 94   | 16 |
| <b>Overall health</b>          | Quality of life               | KIDSCREEN-10               | BM         | nr      | ns          | -                   | 93   | 14 |
|                                |                               | PedsQL                     | ZBI        | P       | 0.40***     | -                   | 120  | 23 |
| <b>Social environment</b>      | Social support                | SSSS                       | BM         | nr      | ns          | -0.19*(nr)          | 93   | 14 |
|                                | Environment                   | Space for child locomotion | ZBI        | P       | nr*         | -                   | 21   | 26 |

BMI: Body mass index; GMFCS: Gross Motor Function Classification System; GMFCS-ER: Gross Motor Function Classification System- Expanded and Revised; FIM: Functional Independence Measure; SDQ: Strengths and Difficulties Questionnaire; KIDSCREEN-10: The shortest version of Kidscreen questionnaires; PedsQL: Pediatric Quality of Life 4.0 Generic Core Scales; SSSS: Satisfaction with social support scale for children and adolescents.

S: Spearman's linear correlation coefficient/ Spearman's Rho correlation; P: Pearson correlation coefficient; A: One-way analysis of variance (ANOVA); T: Independent Student's t-test  
R: Univariate regression analysis; nr: not reported; ns: not significant; U: Mann-Whitney U; H: Kruskal-Wallis H; C: Chi-squared test; nr: not reported; ns: not significant.

\*\*\*\*P < 0.0001, \*\*\*P < 0.001, \*\*P < 0.01, \*P < 0.05

## Discussion

Caring for children with CP is a stressful and difficult task for primary caregivers, especially for their parents. Caregivers of children with CP were under higher pressure than caregivers of healthy children (12, 28, 29). There were many factors that affect the caregiving burden for children with CP. In our systematic review, we focused on both caregiver characteristics and children characteristics as factors of caregiver burden. There are fewer studies involving children-related factors than caregiver-related factors, possibly because caregiver-related factors are more likely to modify. This review revealed that anxiety and depression of caregiver, severity of illness in children with CP were moderate quality of evidence for factors contributing to caregiver burden. But our ability to draw conclusions on remaining caregiver and children characteristics as factors is limited because of low to very low quality of evidence.

Moderate quality was found for the association between caregiver burden and depression symptoms of the caregiver. Feelings of depression are positively correlated with caregiver burden of the caregiver. But the factor for mental health predicting psychological well-being of the caregiver as well was rated as very low quality of evidence. This may be due to the limited number of studies that did not yield reliable evidence. Three studies included in this review revealed that caregivers, who experience poor psychological condition, are more likely to experience high caregiver burden. This correlation between mental health of caregiver and caregiver burden is consistent with the findings in other children with neurodevelopmental diseases, such as epilepsy and autism spectrum disorder (30, 31, 32). Mother caregivers constitutes the majority of caregiving. Long-term care of children with CP and restricted social activity for the mother caregiver predict more psychological conditions such as anxiety, depression, and distress in them (33). Caregivers who feel depressed experience a greater burden of care, thereby affecting CP children's quality of life (23). A study revealed that psychological interventions such as Stepping Stones Triple P therapy (SSTP), Acceptance and Commitment Therapy (ACT) could improve parental mental wellbeing of parents of children with CP. It is crucial to develop more interventions that focus primarily on the psychological wellbeing of the parents (34).

Low quality of evidence was found for the relationship between caregiver burden and fatigue of the caregiver. Fatigue of caregivers are positively related to caregiver burden. Children with CP are often accompanied by intellectual and physical disabilities. Daily life care and assistance with rehabilitation exercises mean more physical strength and energy for the caregiver, so that caregivers often experience problems such as body pain, fatigue and sleep problems (12, 35, 36, 37, 38), which seriously affect the physical well-being and reduce the quality of life of the caregiver (39, 40). Few studies have focused on interventions for caregivers' physical conditions. We should actively pay attention to the physical health of the caregiver and take feasible interventions to improve the physical functioning of caregivers of children with CP.

In our systematic review, it is not sufficiently concluded that social support for caregivers is a positive factor in reducing the burden. But many previous studies have explored the correlation between social support and parenting stress in caregivers of children with CP. Negative associations were found between the levels of stress among parents and social support perceived by them (41, 42, 43, 44). Many families faced financial difficulties and restricted access to healthcare services (45, 46). Social support from spouses, social organization and medical institution help prevent and decrease the stressful situation of the family's experience in providing

1  
2  
3 care to children with CP (43, 47). Although parenting stress and caregiver burden have similar  
4 meanings, this review focuses on caregiver burden and involves fewer relevant articles about the  
5 association between social support and care burden, so more evidence is needed to determine their  
6 relevance.  
7

8 The factor for severity of illness in CP children as moderate quality of evidence is positively  
9 correlated with the burden of caregiver. GMFCS score is most commonly used to measure the  
10 severity of disability of children with CP. Children with more severe disabilities require the more  
11 support of their caregivers to carry out the activities of daily living. Caregivers will spend more  
12 time and physical strength to meet the caregiving demands (38, 48), and the caregiver burden will  
13 be heavier. In addition, there was no significant correlation between the age of CP children and the  
14 caregiver burden. And the gender of children with CP may affect the caregiver's burden. The  
15 burden of care for male child is greater than that of female child, probably because of the greater  
16 mobility of male children. At present, there are many researches on motor function intervention  
17 for children with CP. A guideline synthesized approaches to functional exercise in walking ability  
18 and hand mobility in children, indicating whole-task practice combined with assistive devices  
19 could increase independence and reduce caregiver burden (49).  
20  
21  
22  
23

24 This systematic review offers insight into factors related to caregiver burden and guides the  
25 supportive interventions aiming to reduce caregiver burden, but more additional research into  
26 factors associated with caregiver burden is needed.  
27  
28

### 29 **Strengths and Limitations**

30 This review was the first one to provide a comprehensive overview of caregiver burden of  
31 children with CP. The protocol was registered on the PROSPERO database (CRD42021268284)  
32 and was carried out based on the PRISMA guidelines. The quality of evidence for factors was  
33 judged by the GRADE approach. There were also some limitations of the review. First, the  
34 included literatures used different measurement tools, and the survey factors of the total care  
35 burden with/without the burden of each dimension were scattered. Secondly, due to the uneven  
36 quality of the included studies, the quality of the literature is at a medium level, and convenience  
37 sampling is often used, which has many methodological limitations.  
38  
39  
40  
41

### 42 **Conclusion**

43 Caregivers of children with CP generally have a heavy burden of caregiving, which has affected  
44 the physical, psychological, social and economic conditions of the caregivers. We summarized  
45 factors related to caregiver burden from the aspects of caregiver factors and children factors. The  
46 results revealed that depression of caregiver and severity of illness in children with CP were  
47 moderate quality of evidence for factors contributing to caregiver burden. At present, the relevant  
48 literature on the factors affecting the caregiver burden of children with CP are mostly  
49 cross-sectional studies, and lack of longitudinal studies with high demonstration efficiency. In the  
50 future, we should focus on carrying out high-quality longitudinal research, and verifying the  
51 relevant influencing factors of caregiver burden of children with CP. Moreover, by identifying all  
52 the factors, healthcare professionals can provide appropriate assistance to relieve caregiver burden  
53 and improve the quality of caregiving for children with CP.  
54  
55  
56  
57  
58  
59  
60

### Contributor statement

This study was conceived and designed by FL and QS. FL developed the search strategy and performed the literature search. FL and QS performed full-text reviews and extraction of data. FL and MH conducted the statistical analysis with input from QS. FL wrote the first draft. HyZ was responsible for project administration and supervision on revised paper. All authors reviewed all drafts and approved the final submitted manuscript. Data extraction and quality assessment adhered to PRISMA guidelines.

### Funding

This work was supported by Nursing School of Chongqing Medical University (HLJYK202107) and Future Medicine Youth Innovation Team Support Program of Chongqing Medical University (W0008).

### Competing interests

No competing interest.

### Data sharing statement

All data relevant to the study are included in the article or uploaded as supplementary information.

### Ethics statements

#### Patient consent for publication

Not applicable.

#### Ethics approval

This realist synthesis included literature that is available in the public domain and did not involve the collection of personal data.

### References

1. McIntyre S, Goldsmith S, Webb A, et al. Global prevalence of cerebral palsy: A systematic analysis. *Dev Med Child Neurol*. 2022;64(12):1494-1506.
2. Bax M, Goldstein M, Rosenbaum P, Leviton A, Paneth N, Dan B, Jacobsson B, Damiano D; Executive Committee for the Definition of Cerebral Palsy. Proposed definition and classification of cerebral palsy, April 2005. *Dev Med Child Neurol*. 2005 Aug;47(8):571-6.
3. Odding E, Roebroek ME, Stam HJ. The epidemiology of cerebral palsy: incidence, impairments and risk factors. *Disabil Rehabil*. 2006;28:183-91
4. Elbasan B, Duzgun I, Oskay D. Is There any Difference in Health Related Quality of Life, Self Care and Social Function in Children with Different Disabilities Living in Turkey? *Iran J Pediatr*. 2013 Jun;23(3):281-8.
5. Aisen ML, Kerkovich D, Mast J, Mulroy S, Wren TA, Kay RM, et al. Cerebral palsy: clinical care and neurological rehabilitation. *Lancet Neurol*. 2011;10:844-52.
6. Vargus-Adams J. Parent stress and children with cerebral palsy. *Dev Med Child Neurol*.

2011;53:777.

7. Polack S, Adams M, O'banion D, Baltussen M, Asante S, Kerac M, Gladstone M, Zuurmond M. Children with cerebral palsy in Ghana: malnutrition, feeding challenges, and caregiver quality of life. *Dev Med Child Neurol*. 2018 Sep;60(9):914-921.
8. Terathongkum S, Panyatanakun N, Arj-Ong Vallibhakara S. Factors associated with well-being of family caregivers of children with cerebral palsy in bangkok. *Journal of the Medical Association of Thailand*. 2020;103(11):1214-9.
9. Kasuya RT, Polgar-Bailey P, Takeuchi R. Caregiver burden and burnout. A guide for primary care physicians. *Postgrad Med*. 2000 Dec;108(7):119-23.
10. Ying K, Rostenberghe HV, Kuan G, Mohd Yusoff MHA, Ali SH, Yaacob NS. Health-Related Quality of Life and Family Functioning of Primary Caregivers of Children with Cerebral Palsy in Malaysia. *Int J Environ Res Public Health*. 2021 Feb 28;18(5):2351.
  1. Vadivelan K, Sekar P, Sruthi SS, Gopichandran V. Burden of caregivers of children with cerebral palsy: an intersectional analysis of gender, poverty, stigma, and public policy. *BMC Public Health*. 2020 May 8;20(1):645.
  2. Albayrak I, Biber A, Çalışkan A, Levendoglu F. Assessment of pain, care burden, depression level, sleep quality, fatigue and quality of life in the mothers of children with cerebral palsy. *J Child Health Care*. 2019 Sep;23(3):483-494.
  3. Lee MH, Matthews AK, Park C. Determinants of Health-related Quality of Life Among Mothers of Children With Cerebral Palsy. *J Pediatr Nurs*. 2019 Jan-Feb;44:1-8.
  4. Carona C, Crespo C, Canavaro MC. Similarities amid the difference: Caregiving burden and adaptation outcomes in dyads of parents and their children with and without cerebral palsy. *Research in developmental disabilities*. 2013;34(3):882-93.
  5. Bella GP, Garcia MC, Spadari-Bratfisch RC. Salivary cortisol, stress, and health in primary caregivers (mothers) of children with cerebral palsy. *Psychoneuroendocrinology*. 2011;36(6):834-42.
  6. Whittingham K, Wee D, Sanders MR, Boyd R. Predictors of psychological adjustment, experienced parenting burden and chronic sorrow symptoms in parents of children with cerebral palsy. *Child: care, health and development*. 2013;39(3):366-73.
  7. Farajzadeh A, Dehghanizadeh M, Maroufizadeh S, Amini M, Shamili A. Predictors of mental health among parents of children with cerebral palsy during the COVID-19 pandemic in Iran: A web-based cross-sectional study. *Research in developmental disabilities*. 2021;112:103890.
  8. Boztepe H, Çınar S, Ay A, Kerimoğlu Yıldız G, Kılıç C. Predictors of caregiver burden in mothers of children with leukemia and cerebral palsy. *Journal of psychosocial oncology*. 2019;37(1):69-78.
  9. Omole JO, Adegoke SA, Omole KO, Mbada CE, Adedeji GA, Adeyemi OA. Levels, Correlates, and Predictors of Stress and Caregiver Burden among Caregivers of Children with Cerebral Palsy in Nigeria. *Journal of Pediatric Neurology*. 2019;17(1):13-21.
  20. Farajzadeh A, Maroufizadeh S, Amini M. Factors associated with quality of life among mothers of children with cerebral palsy. *International journal of nursing practice*. 2020;26(3):e12811.
  2. Wijesinghe CJ, Cunningham N, Fonseka P, Hewage CG, Østbye T. Factors associated with caregiver burden among caregivers of children with cerebral palsy in Sri Lanka. *Asia-Pacific journal of public health*. 2015;27(1):85-95.
  22. Barutcu A, Barutcu S, Kolkiran S, Ozdener F. Evaluation of Anxiety, Depression and Burden on Caregivers of Children with Cerebral Palsy. *Developmental neurorehabilitation*. 2021.
  23. Ozkan Y. Child's quality of life and mother's burden in spastic cerebral palsy: a topographical classification perspective. *Journal of International Medical Research*. 2018;46(8):3131-7.
  24. Gugala B. Caregiver burden versus intensity of anxiety and depression symptoms in parents of children with cerebral palsy as well as factors potentially differentiating the level of burden: a



- cross-sectional study (Poland). *BMJ open*. 2021;11(6):e036494.
25. Marrón EM, Redolar-Ripoll D, Boixadós M, Nieto R, Guillamón N, Hernández E, et al. Burden on caregivers of children with cerebral palsy: Predictors and related factors. *Universitas Psychologica*. 2013;12(3):767-78.
26. Santos AAS, Araújo JA, Vargas MM, Oliveira CCC. The influence of household environment on caregivers' overload of children with cerebral paralysis. *Acta Scientiarum - Health Sciences*. 2012;34(SPL.):315-20.
27. Moriwaki M, Yuasa H, Kakehashi M, Suzuki H, Kobayashi Y. Impact of social support for mothers as caregivers of cerebral palsy children in Japan. *J Pediatr Nurs*. 2022;63:e64-e71.
28. Ramanandi VH, Rao B. COMPARISON OF STRESS LEVELS IN THE PARENTS OF CHILDREN WITH CEREBRAL PALSY AND PARENTS OF NORMAL CHILDREN IN VADODARA REGION OF GUJARAT. *International Journal of Physiotherapy*. 2015;2(2):421-8.
29. Wang HY, Jong YJ. Parental stress and related factors in parents of children with cerebral palsy. *Kaohsiung Journal of Medical Sciences*. 2004;20(7):334-40.
30. Pokharel R, Poudel P, Lama S, Thapa K, Sigdel R, Shrestha E. Burden and Its Predictors among Caregivers of Patient with Epilepsy. *J Epilepsy Res*. 2020 Jun 30;10(1):24-30.
31. Lerthattasilp T, Charernboon T, Chunsuwan I, Siriumpunkul P. Depression and burden among caregivers of children with autistic spectrum disorder. *J Med Assoc Thai*. 2015 Mar;98 Suppl 2:S45-52.
32. Singh P, Ghosh S, Nandi S. Subjective Burden and Depression in Mothers of Children with Autism Spectrum Disorder in India: Moderating Effect of Social Support. *J Autism Dev Disord*. 2017 Oct;47(10):3097-3111.
33. Barreto TM, Bento MN, Barreto TM, Jagersbacher JG, Jones NS, Lucena R, Bandeira ID. Prevalence of depression, anxiety, and substance-related disorders in parents of children with cerebral palsy: a systematic review. *Dev Med Child Neurol*. 2020 Feb;62(2):163-168.
34. Irwin L, Jesmont C, Basu A. A systematic review and meta-analysis of the effectiveness of interventions to improve psychological wellbeing in the parents of children with cerebral palsy. *Res Dev Disabil*. 2019;95:103511.
35. Czupryna K, Nowotny-Czupryna O, Nowotny J. Back pain in mothers of cerebral palsied children. *Ortop Traumatol Rehabil*. 2014 Sep-Oct;16(5):497-505.
36. Garip Y, Ozel S, Tuncer OB, Kilinc G, Seckin F, Arasil T. Fatigue in the mothers of children with cerebral palsy. *Disabil Rehabil*. 2017 Apr;39(8):757-762.
37. Lang CP, Boucaut A, Guppy M, Johnston LM. Children with cerebral palsy: A cross-sectional study of their sleep and their caregiver's sleep quality, psychological health and well-being. *Child Care Health Dev*. 2021 Nov;47(6):859-868.
38. Gokcin Eminel A, Kahraman T, Genc A. Physical workload during caregiving activities and related factors among the caregivers of children with cerebral palsy. *Ir J Med Sci*. 2021 May;190(2):701-709.
39. Kaya K, Unsal-Delialioglu S, Ordu-Gokkaya NK, Ozisler Z, Ergun N, Ozel S, Ucan H. Musculo-skeletal pain, quality of life and depression in mothers of children with cerebral palsy. *Disabil Rehabil*. 2010;32(20):1666-72.
40. Raina P, O'Donnell M, Rosenbaum P, Brehaut J, Walter SD, Russell D, Swinton M, Zhu B, Wood E. The health and well-being of caregivers of children with cerebral palsy. *Pediatrics*. 2005 Jun;115(6):e626-36.
41. Wang Y, Huang Z, Kong F. Parenting stress and life satisfaction in mothers of children with cerebral palsy: The mediating effect of social support. *J Health Psychol*. 2020 Mar;25(3):416-425.
42. Lima MBS, Dos Santos Cardoso V, Da Costa Silva SS. Parental stress and social support of caregivers of children with cerebral palsy. *Paideia*. 2016;26(64):207-14.
43. Alias NA, Azizan N, Azizan NA. Relationship between Level of Stress and Social Support among Parents of Children with Cerebral Palsy. *Environment-Behaviour Proceedings Journal*.

2020;5(14):105-10.

44. Gordon A, Lang C, Larkin R, Johnston LM. Effect of social support services on the emotional well-being of caregivers of children with cerebral palsy. *Developmental medicine and child neurology*. 2012;54:62-3.

45. Ismail A, Sk Abd Razak R, Suddin LS, Mahmud A, Kamaralzaman S, Yusri G. The Economic Burden and Determinant Factors of Parents/Caregivers of Children with Cerebral Palsy in Malaysia: A Mixed Methods Study. *Int J Environ Res Public Health*. 2022 Jan 1;19(1):475.

46. Ribeiro MF, Sousa AL, Vandenberghe L, Porto CC. Parental stress in mothers of children and adolescents with cerebral palsy. *Rev Lat Am Enfermagem*. 2014 May-Jun;22(3):440-7.

47. Al-Gamal E, Long T. Psychological distress and perceived support among Jordanian parents living with a child with cerebral palsy: a cross-sectional study. *Scand J Caring Sci*. 2013 Sep;27(3):624-31.

48. Sawyer, M. G., et al. (2011). Time demands of caring for children with cerebral palsy: what are the implications for maternal mental health? *Dev Med Child Neurol* 53(4): 338-343.

49. Jackman M, Sakzewski L, Morgan C, Boyd RN, Brennan SE, Langdon K, Toovey RAM, Greaves S, Thorley M, Novak I. Interventions to improve physical function for children and young people with cerebral palsy: international clinical practice guideline. *Dev Med Child Neurol*. 2022 May;64(5):536-549.

peer review only

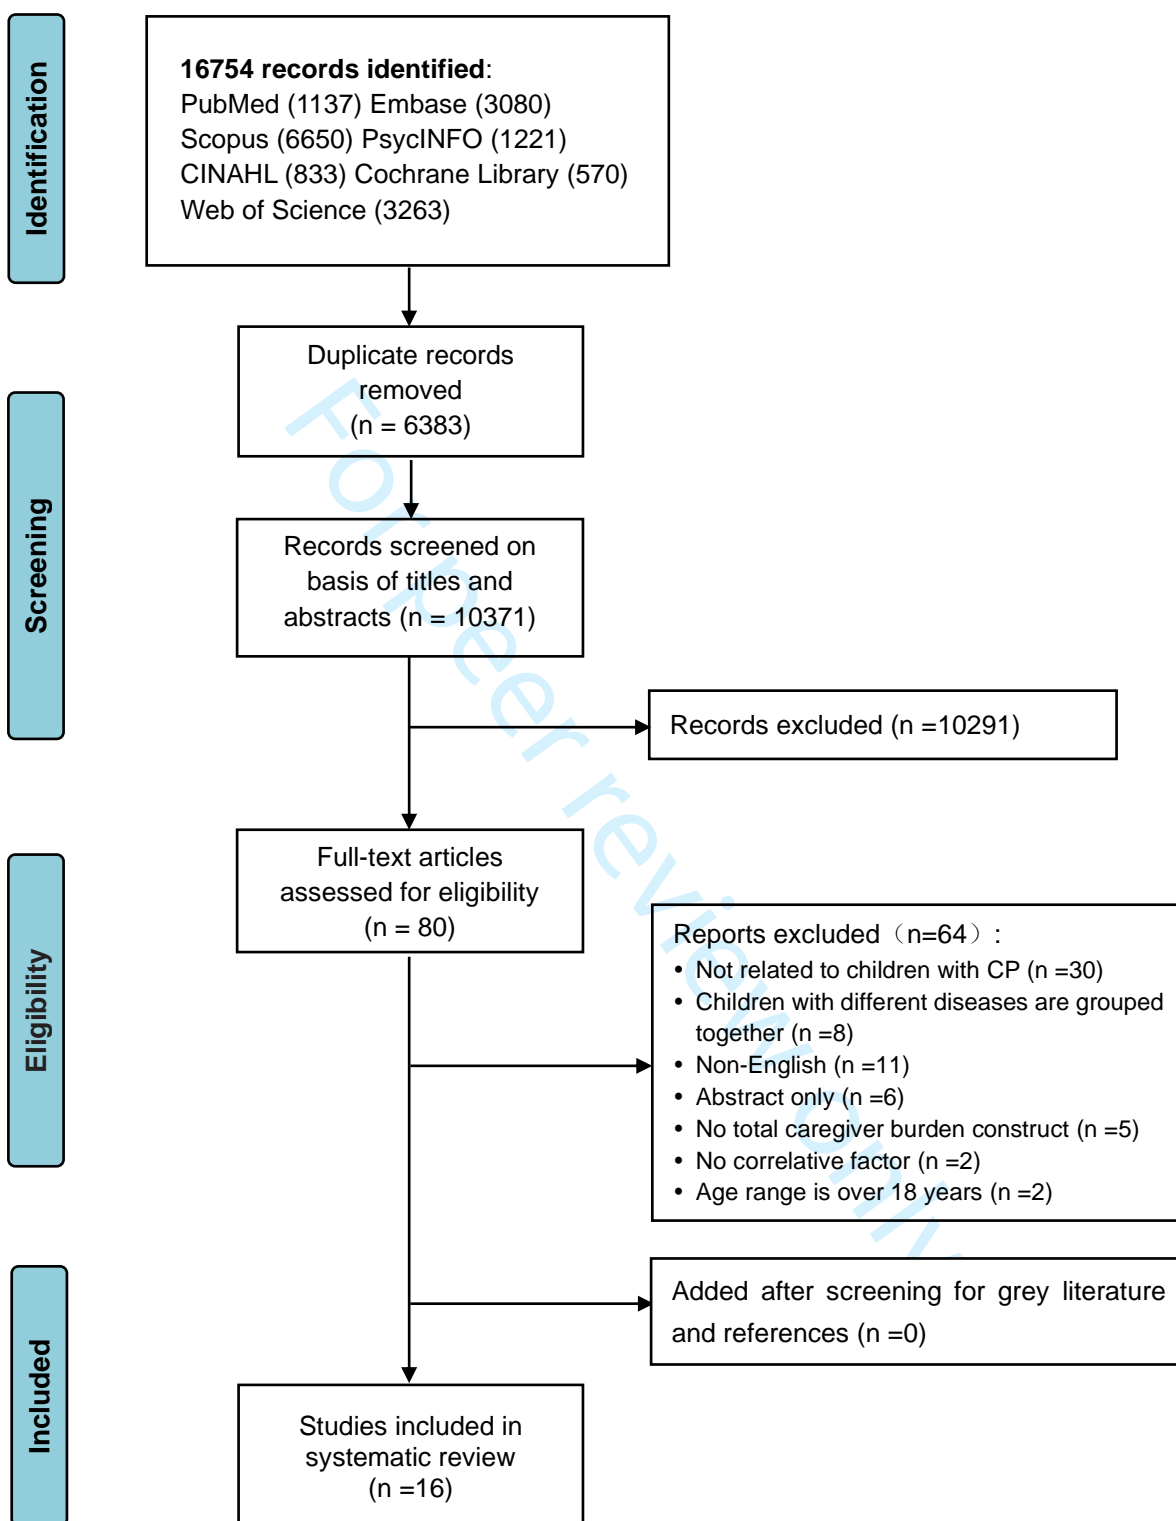

**Figure 1.** Flow diagram for a systematic literature review on caregiver burden in children with cerebral palsy

Supplementary Table. Quality of evidence for potential factors

| Potential factors   | Participant (n) | NO. of studies | Bivariate |   |    | Multivariate |   |   | Grade factors |               |              |             |                  |                 |          |
|---------------------|-----------------|----------------|-----------|---|----|--------------|---|---|---------------|---------------|--------------|-------------|------------------|-----------------|----------|
|                     |                 |                | +         | 0 | -  | +            | 0 | - | Risk of bias  | Inconsistency | Indirectness | Imprecision | Publication bias | Overall quality |          |
| <b>Caregiver</b>    |                 |                |           |   |    |              |   |   |               |               |              |             |                  |                 |          |
| Age                 | 938             | 6              | 1         | 4 | 0  | 0            | 1 | 0 | √             | √             | √            | √           | √                | √               | Low      |
| Education           | 762             | 4              | 1         | 2 | 0  | 1            | 1 | 0 | √             | ×             | √            | √           | √                | √               | Very low |
| Monthly income      | 762             | 4              | 2         | 1 | 0  | 1            | 1 | 0 | √             | ×             | √            | √           | √                | √               | Very low |
| Anxiety             | 459             | 3              | 3         | 0 | 0  | 1            | 0 | 0 | √             | √             | √            | √           | √                | √               | Low      |
| Depression          | 894             | 7              | 5         | 0 | 0  | 3            | 0 | 0 | √             | √             | √            | √           | √                | √               | Moderate |
| Mental health       | 435             | 4              | 0         | 2 | 3  | 0            | 0 | 1 | √             | ×             | √            | √           | √                | √               | Very low |
| Fatigue             | 342             | 3              | 3         | 0 | 0  | 0            | 0 | 0 | √             | √             | √            | √           | √                | √               | Low      |
| Physical health     | 342             | 3              | 0         | 2 | 3  | 0            | 0 | 0 | √             | ×             | √            | √           | √                | √               | Very low |
| Social support      | 1358            | 3              | 0         | 8 | 11 | 0            | 3 | 2 | √             | √             | √            | √           | √                | √               | Very low |
| <b>Children</b>     |                 |                |           |   |    |              |   |   |               |               |              |             |                  |                 |          |
| Age                 | 2128            | 7              | 0         | 6 | 0  | 0            | 1 | 0 | √             | √             | √            | √           | √                | √               | Low      |
| Gender              | 762             | 4              | 2         | 1 | 0  | 2            | 1 | 0 | √             | √             | √            | √           | √                | √               | Low      |
| Number of Children  | 1743            | 4              | 1         | 2 | 0  | 0            | 1 | 0 | √             | √             | √            | √           | √                | √               | Low      |
| Severity of illness | 1631            | 5              | 3         | 0 | 0  | 3            | 0 | 0 | √             | √             | √            | √           | √                | √               | Moderate |

For bivariate and multivariate analyses: +: number of significant associations with a positive value; 0: number of non-significant associations; -: number of significant associations with a negative value; For GRADE factors: ✓: no serious limitations; ×: serious limitations. For overall quality of evidence: very low, low, moderate, high.

## Appendix 1-1 PRISMA Checklist

| Section and Topic             | Item # | Checklist item                                                                                                                                                                                                                                                                                       | Reported on page # |
|-------------------------------|--------|------------------------------------------------------------------------------------------------------------------------------------------------------------------------------------------------------------------------------------------------------------------------------------------------------|--------------------|
| <b>TITLE</b>                  |        |                                                                                                                                                                                                                                                                                                      |                    |
| Title                         | 1      | Identify the report as a systematic review.                                                                                                                                                                                                                                                          | Title page         |
| <b>ABSTRACT</b>               |        |                                                                                                                                                                                                                                                                                                      |                    |
| Abstract                      | 2      | See the PRISMA 2020 for Abstracts checklist.                                                                                                                                                                                                                                                         | See table below    |
| <b>INTRODUCTION</b>           |        |                                                                                                                                                                                                                                                                                                      |                    |
| Rationale                     | 3      | Describe the rationale for the review in the context of existing knowledge.                                                                                                                                                                                                                          | 3                  |
| Objectives                    | 4      | Provide an explicit statement of the objective(s) or question(s) the review addresses.                                                                                                                                                                                                               | 3                  |
| <b>METHODS</b>                |        |                                                                                                                                                                                                                                                                                                      |                    |
| Eligibility criteria          | 5      | Specify the inclusion and exclusion criteria for the review and how studies were grouped for the syntheses.                                                                                                                                                                                          | 3-4                |
| Information sources           | 6      | Specify all databases, registers, websites, organisations, reference lists and other sources searched or consulted to identify studies. Specify the date when each source was last searched or consulted.                                                                                            | 3                  |
| Search strategy               | 7      | Present the full search strategies for all databases, registers and websites, including any filters and limits used.                                                                                                                                                                                 | Appendix 2         |
| Selection process             | 8      | Specify the methods used to decide whether a study met the inclusion criteria of the review, including how many reviewers screened each record and each report retrieved, whether they worked independently, and if applicable, details of automation tools used in the process.                     | 4                  |
| Data collection process       | 9      | Specify the methods used to collect data from reports, including how many reviewers collected data from each report, whether they worked independently, any processes for obtaining or confirming data from study investigators, and if applicable, details of automation tools used in the process. | 4                  |
| Data items                    | 10a    | List and define all outcomes for which data were sought. Specify whether all results that were compatible with each outcome domain in each study were sought (e.g. for all measures, time points, analyses), and if not, the methods used to decide which results to collect.                        | 4                  |
|                               | 10b    | List and define all other variables for which data were sought (e.g. participant and intervention characteristics, funding sources). Describe any assumptions made about any missing or unclear information.                                                                                         | 4                  |
| Study risk of bias assessment | 11     | Specify the methods used to assess risk of bias in the included studies, including details of the tool(s) used, how many reviewers assessed each study and whether they worked independently, and if applicable, details of automation tools used in the process.                                    | 4                  |
| Effect measures               | 12     | Specify for each outcome the effect measure(s) (e.g. risk ratio, mean difference) used in the synthesis or presentation of results.                                                                                                                                                                  | 4                  |
| Synthesis methods             | 13a    | Describe the processes used to decide which studies were eligible for each synthesis (e.g. tabulating the study intervention characteristics and comparing against the planned groups for each synthesis (item #5)).                                                                                 | 4                  |
|                               | 13b    | Describe any methods required to prepare the data for presentation or synthesis, such as handling of missing summary statistics, or data conversions.                                                                                                                                                | 4                  |
|                               | 13c    | Describe any methods used to tabulate or visually display results of individual studies and syntheses.                                                                                                                                                                                               | 4                  |
|                               | 13d    | Describe any methods used to synthesize results and provide a rationale for the choice(s). If meta-analysis was performed, describe the model(s), method(s) to identify the presence and extent of statistical heterogeneity, and software package(s) used.                                          | 4                  |
|                               | 13e    | Describe any methods used to explore possible causes of heterogeneity among study results (e.g. subgroup analysis, meta-regression).                                                                                                                                                                 | Not applicable     |

| Section and Topic                              | Item # | Checklist item                                                                                                                                                                                                                                                                       | Reported on page # |
|------------------------------------------------|--------|--------------------------------------------------------------------------------------------------------------------------------------------------------------------------------------------------------------------------------------------------------------------------------------|--------------------|
|                                                | 13f    | Describe any sensitivity analyses conducted to assess robustness of the synthesized results.                                                                                                                                                                                         | 4                  |
| Reporting bias assessment                      | 14     | Describe any methods used to assess risk of bias due to missing results in a synthesis (arising from reporting biases).                                                                                                                                                              | 4                  |
| Certainty assessment                           | 15     | Describe any methods used to assess certainty (or confidence) in the body of evidence for an outcome.                                                                                                                                                                                | 4                  |
| <b>RESULTS</b>                                 |        |                                                                                                                                                                                                                                                                                      |                    |
| Study selection                                | 16a    | Describe the results of the search and selection process, from the number of records identified in the search to the number of studies included in the review, ideally using a flow diagram.                                                                                         | Figure 1           |
|                                                | 16b    | Cite studies that might appear to meet the inclusion criteria, but which were excluded, and explain why they were excluded.                                                                                                                                                          | Figure 1           |
| Study characteristics                          | 17     | Cite each included study and present its characteristics.                                                                                                                                                                                                                            | Table 1            |
| Risk of bias in studies                        | 18     | Present assessments of risk of bias for each included study.                                                                                                                                                                                                                         | Appendix 5         |
| Results of individual studies                  | 19     | For all outcomes, present, for each study: (a) summary statistics for each group (where appropriate) and (b) an effect estimate and its precision (e.g. confidence/credible interval), ideally using structured tables or plots.                                                     | Table 1            |
| Results of syntheses                           | 20a    | For each synthesis, briefly summarise the characteristics and risk of bias among contributing studies.                                                                                                                                                                               | Not applicable     |
|                                                | 20b    | Present results of all statistical syntheses conducted. If meta-analysis was done, present for each the summary estimate and its precision (e.g. confidence/credible interval) and measures of statistical heterogeneity. If comparing groups, describe the direction of the effect. | Table 2 and 3      |
|                                                | 20c    | Present results of all investigations of possible causes of heterogeneity among study results.                                                                                                                                                                                       | Not applicable     |
|                                                | 20d    | Present results of all sensitivity analyses conducted to assess the robustness of the synthesized results.                                                                                                                                                                           | Not applicable     |
| Reporting biases                               | 21     | Present assessments of risk of bias due to missing results (arising from reporting biases) for each synthesis assessed.                                                                                                                                                              | Table 4            |
| Certainty of evidence                          | 22     | Present assessments of certainty (or confidence) in the body of evidence for each outcome assessed.                                                                                                                                                                                  | Table 4            |
| <b>DISCUSSION</b>                              |        |                                                                                                                                                                                                                                                                                      |                    |
| Discussion                                     | 23a    | Provide a general interpretation of the results in the context of other evidence.                                                                                                                                                                                                    | 16-17              |
|                                                | 23b    | Discuss any limitations of the evidence included in the review.                                                                                                                                                                                                                      | 17                 |
|                                                | 23c    | Discuss any limitations of the review processes used.                                                                                                                                                                                                                                | 17                 |
|                                                | 23d    | Discuss implications of the results for practice, policy, and future research.                                                                                                                                                                                                       | 17                 |
| <b>OTHER INFORMATION</b>                       |        |                                                                                                                                                                                                                                                                                      |                    |
| Registration and protocol                      | 24a    | Provide registration information for the review, including register name and registration number, or state that the review was not registered.                                                                                                                                       | 3                  |
|                                                | 24b    | Indicate where the review protocol can be accessed, or state that a protocol was not prepared.                                                                                                                                                                                       | Not described      |
|                                                | 24c    | Describe and explain any amendments to information provided at registration or in the protocol.                                                                                                                                                                                      | Not described      |
| Support                                        | 25     | Describe sources of financial or non-financial support for the review, and the role of the funders or sponsors in the review.                                                                                                                                                        | 18                 |
| Competing interests                            | 26     | Declare any competing interests of review authors.                                                                                                                                                                                                                                   | 18                 |
| Availability of data, code and other materials | 27     | Report which of the following are publicly available and where they can be found: template data collection forms; data extracted from included studies; data used for all analyses; analytic code; any other materials used in the review.                                           | 18                 |

## Appendix 1-2 PRISMA 2020 for Abstracts Checklist

| Section and Topic       | Item # | Checklist item                                                                                                                                                                                                                                                                                        | Reported (Yes/No) |
|-------------------------|--------|-------------------------------------------------------------------------------------------------------------------------------------------------------------------------------------------------------------------------------------------------------------------------------------------------------|-------------------|
| <b>TITLE</b>            |        |                                                                                                                                                                                                                                                                                                       |                   |
| Title                   | 1      | Identify the report as a systematic review.                                                                                                                                                                                                                                                           | Yes               |
| <b>BACKGROUND</b>       |        |                                                                                                                                                                                                                                                                                                       |                   |
| Objectives              | 2      | Provide an explicit statement of the main objective(s) or question(s) the review addresses.                                                                                                                                                                                                           | Yes               |
| <b>METHODS</b>          |        |                                                                                                                                                                                                                                                                                                       |                   |
| Eligibility criteria    | 3      | Specify the inclusion and exclusion criteria for the review.                                                                                                                                                                                                                                          | Yes               |
| Information sources     | 4      | Specify the information sources (e.g. databases, registers) used to identify studies and the date when each was last searched.                                                                                                                                                                        | Yes               |
| Risk of bias            | 5      | Specify the methods used to assess risk of bias in the included studies.                                                                                                                                                                                                                              | Yes               |
| Synthesis of results    | 6      | Specify the methods used to present and synthesise results.                                                                                                                                                                                                                                           | Yes               |
| <b>RESULTS</b>          |        |                                                                                                                                                                                                                                                                                                       |                   |
| Included studies        | 7      | Give the total number of included studies and participants and summarise relevant characteristics of studies.                                                                                                                                                                                         | Yes               |
| Synthesis of results    | 8      | Present results for main outcomes, preferably indicating the number of included studies and participants for each. If meta-analysis was done, report the summary estimate and confidence/credible interval. If comparing groups, indicate the direction of the effect (i.e. which group is favoured). | Yes               |
| <b>DISCUSSION</b>       |        |                                                                                                                                                                                                                                                                                                       |                   |
| Limitations of evidence | 9      | Provide a brief summary of the limitations of the evidence included in the review (e.g. study risk of bias, inconsistency and imprecision).                                                                                                                                                           | Yes               |
| Interpretation          | 10     | Provide a general interpretation of the results and important implications.                                                                                                                                                                                                                           | Yes               |
| <b>OTHER</b>            |        |                                                                                                                                                                                                                                                                                                       |                   |
| Funding                 | 11     | Specify the primary source of funding for the review.                                                                                                                                                                                                                                                 | Yes               |
| Registration            | 12     | Provide the register name and registration number.                                                                                                                                                                                                                                                    | Yes               |

## Appendix 2 Literature Search

**First search:** no filters

**Supplementary search:** filters applied from 2021/7/24—2023/2/1

The rest are not specifically qualified for retrieval.

### CINAHL search strategy

((SU caregiver) OR (AB parents) OR (AB mother) OR (AB care\*)) AND ((SU caregiver burden) OR (AB strain) OR (AB stress) OR (AB burnout)) AND ((SU cerebral palsy) OR (AB CP) OR (AB disability\*) OR (AB neurodev\* disorder\*)) AND ((SU children) OR (AB child\*) OR (AB paediatr\*))

### PsycInfo search strategy

((SU caregiver) OR (AB parents) OR (AB mother) OR (AB care\*)) AND ((SU caregiver burden) OR (AB strain) OR (AB stress) OR (AB burnout)) AND ((SU cerebral palsy) OR (AB CP) OR (AB disability\*) OR (AB neurodev\* disorder\*)) AND ((SU children) OR (AB child\*) OR (AB paediatr\*))

### PubMed search strategy

(((((caregiver[MeSH Terms]) OR (parents[Title/Abstract])) OR (mother[Title/Abstract])) OR (care\*[Title/Abstract])) AND (((caregiver burden[MeSH Terms]) OR (stress[Title/Abstract])) OR (strain[Title/Abstract])) OR (burnout[Title/Abstract])) AND (((cerebral palsy[MeSH Terms]) OR (CP[Title/Abstract])) OR (disability\*[Title/Abstract])) OR ((neurodev\* disorder\*[Title/Abstract])) AND (((child[MeSH Terms]) OR (child\*[Title/Abstract])) OR (paediatr\*[Title/Abstract]))

### Embase search strategy

('caregiver'/exp OR caregiver:ti,ab,kw OR care\*:ti,ab,kw OR parents:ti,ab,kw OR mother:ti,ab,kw) AND ('caregiver burden'/exp OR 'caregiver burden':ti,ab,kw OR stress:ti,ab,kw OR strain:ti,ab,kw OR burnout:ti,ab,kw) AND ('cerebral palsy'/exp OR 'cerebral palsy':ti,ab,kw OR CP:ti,ab,kw OR 'neurodev\* disorder\*':ti,ab,kw OR disability\*:ti,ab,kw) AND ('child'/exp OR children:ti,ab,kw OR child\*:ti,ab,kw OR paediatr\*:ti,ab,kw)

### SCOPUS search strategy

( TITLE-ABS-KEY ( "caregiver" ) OR TITLE-ABS-KEY ( "parents" ) OR TITLE-ABS-KEY ( "mother" ) OR TITLE-ABS-KEY ( "care\*" ) ) AND ( TITLE-ABS-KEY ( "burden" ) OR TITLE-ABS-KEY ( "stress" ) OR TITLE-ABS-KEY ( "strain" ) OR TITLE-ABS-KEY ( "burnout" ) ) AND ( TITLE-ABS-KEY ( "cerebral palsy" ) OR TITLE-ABS-KEY ( "CP" ) OR TITLE-ABS-KEY ( "disability\*" ) OR TITLE-ABS-KEY



1  
2  
3 ("neurodev\* disorder\*") ) AND ( TITLE-ABS-KEY ( "children" ) OR TITLE-ABS-KEY  
4 ("child\*") OR TITLE-ABS-KEY ( "paediatr\*" ) )  
5  
6  
7

### 8 **Web of science search strategy**

9 (TS=(caregiver OR parents OR mother OR care\*)) AND (TS=(caregiver burden OR strain OR  
10 stress OR burnout)) AND (TS=(cerebral palsy OR CP OR disability\* OR neurodev\* disorder\*))  
11 AND (TS=( children OR child\* OR paediatr\*))  
12  
13  
14

### 15 **Cochrane Library search strategy**

16  
17 #1 (caregiver):ti,ab,kw OR (parents):ti,ab,kw OR (mother):ti,ab,kw OR (care\*):ti,ab,kw (Word  
18 variations have been searched)  
19 #2 MeSH descriptor: [Caregivers] explode all trees  
20 #3 #1 OR #2  
21  
22 #4 (burden):ti,ab,kw OR (stress):ti,ab,kw OR (strain):ti,ab,kw OR (burnout):ti,ab,kw (Word  
23 variations have been searched)  
24 #5 MeSH descriptor: [Caregiver Burden] explode all trees  
25 #6 #4 OR #5  
26  
27 #7 (cerebral palsy):ti,ab,kw OR (CP):ti,ab,kw OR (disability\*):ti,ab,kw OR (neurodev\*  
28 disorder\*):ti,ab,kw (Word variations have been searched)  
29 #8 MeSH descriptor: [Cerebral Palsy] explode all trees  
30 #9 #7 OR #8  
31  
32 #10 (children):ti,ab,kw OR (child\*):ti,ab,kw OR (paediatr\*):ti,ab,kw (Word variations have been  
33 searched)  
34 #11 MeSH descriptor: [Child] explode all trees  
35 #12 #10 OR #11  
36  
37 #13 #3 AND #6 AND #9 AND #12  
38  
39  
40  
41  
42  
43

### 44 **Grey literature:**

45 [OpenGrey | The Online Library \(london.ac.uk\)](http://opengrey.org.uk/)

46 [Google Scholar \(beds.ac.uk\)](http://scholar.beds.ac.uk/)  
47  
48  
49  
50  
51  
52  
53  
54  
55  
56  
57  
58  
59  
60

## Appendix 3:

### JBI Critical Appraisal Checklist for Analytical Cross Sectional Studies

| Item                                                                                                                            | Yes                      | No                       | Unclear                  | Not applicable           |
|---------------------------------------------------------------------------------------------------------------------------------|--------------------------|--------------------------|--------------------------|--------------------------|
| 1. Were the criteria for inclusion in the sample clearly defined?                                                               | <input type="checkbox"/> | <input type="checkbox"/> | <input type="checkbox"/> | <input type="checkbox"/> |
| 2. Were the study subjects and the setting described in detail?                                                                 | <input type="checkbox"/> | <input type="checkbox"/> | <input type="checkbox"/> | <input type="checkbox"/> |
| 3. Was the exposure measured in a valid and reliable way?                                                                       | <input type="checkbox"/> | <input type="checkbox"/> | <input type="checkbox"/> | <input type="checkbox"/> |
| 4. Were objective, standard criteria used for measurement of the condition?                                                     | <input type="checkbox"/> | <input type="checkbox"/> | <input type="checkbox"/> | <input type="checkbox"/> |
| 5. Were confounding factors identified?                                                                                         | <input type="checkbox"/> | <input type="checkbox"/> | <input type="checkbox"/> | <input type="checkbox"/> |
| 6. Were strategies to deal with confounding factors stated?                                                                     | <input type="checkbox"/> | <input type="checkbox"/> | <input type="checkbox"/> | <input type="checkbox"/> |
| 7. Were the outcomes measured in a valid and reliable way?                                                                      | <input type="checkbox"/> | <input type="checkbox"/> | <input type="checkbox"/> | <input type="checkbox"/> |
| 8. Was appropriate statistical analysis used?                                                                                   | <input type="checkbox"/> | <input type="checkbox"/> | <input type="checkbox"/> | <input type="checkbox"/> |
| Overall appraisal: Include <input type="checkbox"/> Exclude <input type="checkbox"/> Seek further info <input type="checkbox"/> |                          |                          |                          |                          |
| Comments (Including reason for exclusion)                                                                                       |                          |                          |                          |                          |

## EXPLANATION OF ANALYTICAL CROSS SECTIONAL STUDIES CRITICAL APPRAISAL

*How to cite:* Moola S, Munn Z, Tufanaru C, Aromataris E, Sears K, Sfetcu R, Currie M, Qureshi R, Mattis P, Lisy K, Mu P-F. Chapter 7: Systematic reviews of etiology and risk . In: Aromataris E, Munn Z (Editors). *JBI Manual for Evidence Synthesis*. JBI, 2020. Available from <https://synthesismanual.jbi.global>

### Analytical cross sectional studies Critical Appraisal Tool

Answers: Yes, No, Unclear or Not/Applicable

#### 1. Were the criteria for inclusion in the sample clearly defined?

The authors should provide clear inclusion and exclusion criteria that they developed prior to recruitment of the study participants. The inclusion/exclusion criteria should be specified (e.g., risk, stage of disease progression) with sufficient detail and all the necessary information critical to the study.

#### 2. Were the study subjects and the setting described in detail?

The study sample should be described in sufficient detail so that other researchers can determine if it is comparable to the population of interest to them. The authors should provide a clear description of the population from which the study participants were selected or recruited, including demographics, location, and time period.

#### 3. Was the exposure measured in a valid and reliable way?

The study should clearly describe the method of measurement of exposure. Assessing validity requires that a 'gold standard' is available to which the measure can be compared. The validity of

1  
2  
3 exposure measurement usually relates to whether a current measure is appropriate or whether a  
4 measure of past exposure is needed.

5 Reliability refers to the processes included in an epidemiological study to check repeatability of  
6 measurements of the exposures. These usually include intra-observer reliability and inter-observer  
7 reliability.  
8

#### 9 **4. Were objective, standard criteria used for measurement of the condition?**

10 It is useful to determine if patients were included in the study based on either a specified diagnosis  
11 or definition. This is more likely to decrease the risk of bias. Characteristics are another useful  
12 approach to matching groups, and studies that did not use specified diagnostic methods or  
13 definitions should provide evidence on matching by key characteristics  
14

#### 15 **5. Were confounding factors identified?**

16 Confounding has occurred where the estimated intervention exposure effect is biased by the  
17 presence of some difference between the comparison groups (apart from the exposure  
18 investigated/of interest). Typical confounders include baseline characteristics, prognostic factors,  
19 or concomitant exposures (e.g. smoking). A confounder is a difference between the comparison  
20 groups and it influences the direction of the study results. A high quality study at the level of  
21 cohort design will identify the potential confounders and measure them (where possible). This is  
22 difficult for studies where behavioral, attitudinal or lifestyle factors may impact on the results.  
23

#### 24 **6. Were strategies to deal with confounding factors stated?**

25 Strategies to deal with effects of confounding factors may be dealt within the study design or in  
26 data analysis. By matching or stratifying sampling of participants, effects of confounding factors  
27 can be adjusted for. When dealing with adjustment in data analysis, assess the statistics used in the  
28 study. Most will be some form of multivariate regression analysis to account for the confounding  
29 factors measured.  
30

#### 31 **7. Were the outcomes measured in a valid and reliable way?**

32 Read the methods section of the paper. If for e.g. lung cancer is assessed based on existing  
33 definitions or diagnostic criteria, then the answer to this question is likely to be yes. If lung cancer  
34 is assessed using observer reported, or self-reported scales, the risk of over- or under-reporting is  
35 increased, and objectivity is compromised. Importantly, determine if the measurement tools used  
36 were validated instruments as this has a significant impact on outcome assessment validity.  
37

38 Having established the objectivity of the outcome measurement (e.g. lung cancer) instrument, it's  
39 important to establish how the measurement was conducted. Were those involved in collecting  
40 data trained or educated in the use of the instrument/s? (e.g. radiographers). If there was more than  
41 one data collector, were they similar in terms of level of education, clinical or research experience,  
42 or level of responsibility in the piece of research being appraised?  
43

#### 44 **8. Was appropriate statistical analysis used?**

45 As with any consideration of statistical analysis, consideration should be given to whether there  
46 was a more appropriate alternate statistical method that could have been used. The methods  
47 section should be detailed enough for reviewers to identify which analytical techniques were used  
48 (in particular, regression or stratification) and how specific confounders were measured.  
49

50 For studies utilizing regression analysis, it is useful to identify if the study identified which  
51 variables were included and how they related to the outcome. If stratification was the analytical  
52 approach used, were the strata of analysis defined by the specified variables? Additionally, it is  
53 also important to assess the appropriateness of the analytical strategy in terms of the assumptions  
54 associated with the approach as differing methods of analysis are based on differing assumptions  
55 about the data and how it will respond.  
56  
57  
58  
59  
60

#### Appendix 4: GRADE factors

| Item | GRADE factor     | Criteria<br>(No serious limitation = ✓, serious limitation=✗)                                                                                                                                                                            |
|------|------------------|------------------------------------------------------------------------------------------------------------------------------------------------------------------------------------------------------------------------------------------|
| 1.   | Risk of bias     | No serious limitation, if at least 75% of the studies are moderate- (total score 3-5) to high quality (total score 6-8) studies based on the JBI Critical Appraisal Checklist.                                                           |
| 2.   | Inconsistency    | No serious limitation, if the point of effect estimates are not on either side of the line of no effect.                                                                                                                                 |
| 3.   | Indirectness     | No serious limitation, if at least 75% of the studies used a study sample that fully represents the review question.                                                                                                                     |
| 4.   | Imprecision      | No serious limitation, if 75% of the studies applied the rule of thumb: univariate ratio [n:K] exceeds [20:1] and if multivariate ratio [n:K] exceeds [10:1]. In which n represents the sample size and K the number of studied factors. |
| 5.   | Publication bias | No serious limitation, if the factor is investigated in 3 or more studies.                                                                                                                                                               |

## Appendix 5: Quality Assessment List

| References              | Item 1 | Item 2 | Item 3 | Item 4 | Item 5 | Item 6 | Item 7 | Item 8 | Total |
|-------------------------|--------|--------|--------|--------|--------|--------|--------|--------|-------|
| Carona (2013) [14]      | 1      | 1      | 0.5    | 1      | 1      | 1      | 0.5    | 1      | 7     |
| Bella (2011) [15]       | 1      | 1      | 0.5    | 1      | 1      | 1      | 0.5    | 1      | 7     |
| Whittingham (2012) [16] | 1      | 1      | 1      | 1      | 0.5    | 0.5    | 1      | 1      | 7     |
| Farajzadeh (2021) [17]  | 1      | 1      | 1      | 0.5    | 0.5    | 1      | 1      | 1      | 7     |
| Boztepe (2018) [18]     | 1      | 1      | 1      | 0.5    | 1      | 1      | 1      | 1      | 7.5   |
| Omole (2017) [19]       | 1      | 1      | 0.5    | 1      | 0.5    | 1      | 0.5    | 1      | 6.5   |
| Terathongkum (2020) [8] | 1      | 0      | 1      | 0.5    | 0.5    | 0.5    | 1      | 1      | 5.5   |
| Farajzadeh (2020) [20]  | 1      | 1      | 1      | 0.5    | 0.5    | 1      | 1      | 1      | 7     |
| Wijesinghe (2015) [21]  | 0.5    | 0      | 1      | 0.5    | 0.5    | 0      | 1      | 1      | 4.5   |
| Barutcu (2021) [22]     | 1      | 1      | 1      | 1      | 0.5    | 0      | 1      | 1      | 6.5   |
| Ozkan (2018) [23]       | 1      | 1      | 0.5    | 1      | 0.5    | 0      | 0.5    | 1      | 5.5   |
| Gugała (2021) [24]      | 1      | 1      | 1      | 1      | 0.5    | 1      | 1      | 1      | 7.5   |
| Marrón (2013) [25]      | 1      | 0      | 0.5    | 0.5    | 0.5    | 1      | 0.5    | 1      | 5     |
| Albayrak (2019) [12]    | 1      | 1      | 0.5    | 0.5    | 1      | 1      | 0.5    | 1      | 6.5   |
| Santos (2012) [26]      | 1      | 0      | 0.5    | 0.5    | 0.5    | 0      | 0.5    | 1      | 4     |
| Moriwaki et al. (2022)  | 0.5    | 0      | 1      | 0.5    | 1      | 1      | 0.5    | 1      | 5.5   |

1= Yes; 0= NO; 0.5= Unclear
