# Supplementary material for: Factors associated with caregiver burden among family caregivers of children with cerebral palsy: a systematic review
Source: PubMed Central journal article supplement — BMJ Open. 2023 Apr 3;13(4):e065215. doi: 10.1136/bmjopen-2022-065215 (PMC10083783; doi:10.1136/bmjopen-2022-065215), 2023-04-03
Supplement: bmjopen-2022-065215supp003.pdf [file bmjopen-2022-065215supp003.pdf]

Supplementary Table. Quality of evidence for potential factors

| Potential factors   | Participant (n) | NO. of studies | Bivariate |   |    | Multivariate |   |   | Grade factors |               |              |             |                  |                 |
|---------------------|-----------------|----------------|-----------|---|----|--------------|---|---|---------------|---------------|--------------|-------------|------------------|-----------------|
|                     |                 |                | +         | 0 | -  | +            | 0 | - | Risk of bias  | Inconsistency | Indirectness | Imprecision | Publication bias | Overall quality |
| <b>Caregiver</b>    |                 |                |           |   |    |              |   |   |               |               |              |             |                  |                 |
| Age                 | 938             | 6              | 1         | 4 | 0  | 0            | 1 | 0 | √             | √             | √            | √           | √                | Low             |
| Education           | 762             | 4              | 1         | 2 | 0  | 1            | 1 | 0 | √             | ×             | √            | √           | √                | Very low        |
| Monthly income      | 762             | 4              | 2         | 1 | 0  | 1            | 1 | 0 | √             | ×             | √            | √           | √                | Very low        |
| Anxiety             | 459             | 3              | 3         | 0 | 0  | 1            | 0 | 0 | √             | √             | √            | √           | √                | Low             |
| Depression          | 894             | 7              | 5         | 0 | 0  | 3            | 0 | 0 | √             | √             | √            | √           | √                | Moderate        |
| Mental health       | 435             | 4              | 0         | 2 | 3  | 0            | 0 | 1 | √             | ×             | √            | √           | √                | Very low        |
| Fatigue             | 342             | 3              | 3         | 0 | 0  | 0            | 0 | 0 | √             | √             | √            | √           | √                | Low             |
| Physical health     | 342             | 3              | 0         | 2 | 3  | 0            | 0 | 0 | √             | ×             | √            | √           | √                | Very low        |
| Social support      | 1358            | 3              | 0         | 8 | 11 | 0            | 3 | 2 | √             | √             | √            | √           | √                | Very low        |
| <b>Children</b>     |                 |                |           |   |    |              |   |   |               |               |              |             |                  |                 |
| Age                 | 2128            | 7              | 0         | 6 | 0  | 0            | 1 | 0 | √             | √             | √            | √           | √                | Low             |
| Gender              | 762             | 4              | 2         | 1 | 0  | 2            | 1 | 0 | √             | √             | √            | √           | √                | Low             |
| Number of Children  | 1743            | 4              | 1         | 2 | 0  | 0            | 1 | 0 | √             | √             | √            | √           | √                | Low             |
| Severity of illness | 1631            | 5              | 3         | 0 | 0  | 3            | 0 | 0 | √             | √             | √            | √           | √                | Moderate        |

For bivariate and multivariate analyses: +: number of significant associations with a positive value; 0: number of non-significant associations; -: number of significant associations with a negative value; For GRADE factors: ✓: no serious limitations; ×: serious limitations. For overall quality of evidence: very low, low, moderate, high.
